# Supplementary material for: Synthesis of long-chain polyols from the Claisen condensation of γ-valerolactone
Source: Royal Society of Chemistry journal article supplement (doi:10.1039/c9gc03343b), 2019-01-01

## **SUPPORTING INFORMATION**

### **Synthesis of long-chain polyols from the Claisen condensation of $\gamma$ -valerolactone**

Camila S. Santos<sup>[a]</sup>, Caio Soares<sup>[b]</sup>, Adriano Siqueira<sup>[c]</sup> and Antonio C. B. Burloloso<sup>\*[a]</sup>

| <b>Contents</b>                                                | <b>Page</b> |
|----------------------------------------------------------------|-------------|
| Derivatization of compound <b>3</b>                            | 2-3         |
| <sup>1</sup> H and <sup>13</sup> C NMR spectra of all products | 5-36        |

## Derivatization of compound 3 for GC-MS analysis

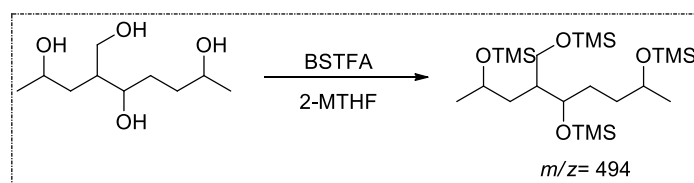

Compound **3** (5 mg, 0,024 mmol), 0.5 mL of dry 2 Methyltetrahydrofuran and 200  $\mu$ L of N,O-Bis(trimethylsilyl)trifluoroacetamide (BSTFA) were added to a 25 mL round bottom flask. Next, the reaction was heated at 60°C during 2h. The system was cooled to 25 °C and a 100  $\mu$ L aliquot of the reaction medium was diluted in 5 mL of dichloromethane. An aliquot of this solution was filtered off (Chromafil, Macherey-Nagel, pore size 0.45 $\mu$ m) and injected into GC-MS. GC-MS analyses were carried out on Shimadzu-CGMS QP 2010 ULTRA gas chromatography on RESTEK Rtx-5MS 5% diphenyl/95% dimethyl polysiloxane capillary Column 30 m  $\times$  0.25 mm, 0.25  $\mu$ m, split injector, entrained gas flow (He) 1.33 mL/min, injector 300 °C, interface 330 °C. Column temperature was started from 45 °C maintained for 1 minute and increased to 170 °C at the rate of 10 °C/min, remaining constant for 3 min. Then, was heated to 330 °C at the rate of 10 °C/min.

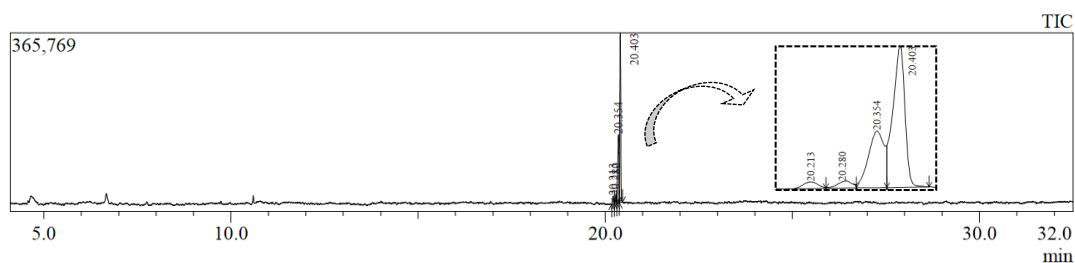

**Figure 2.** GC-MS chromatogram of silylated compound **3**.

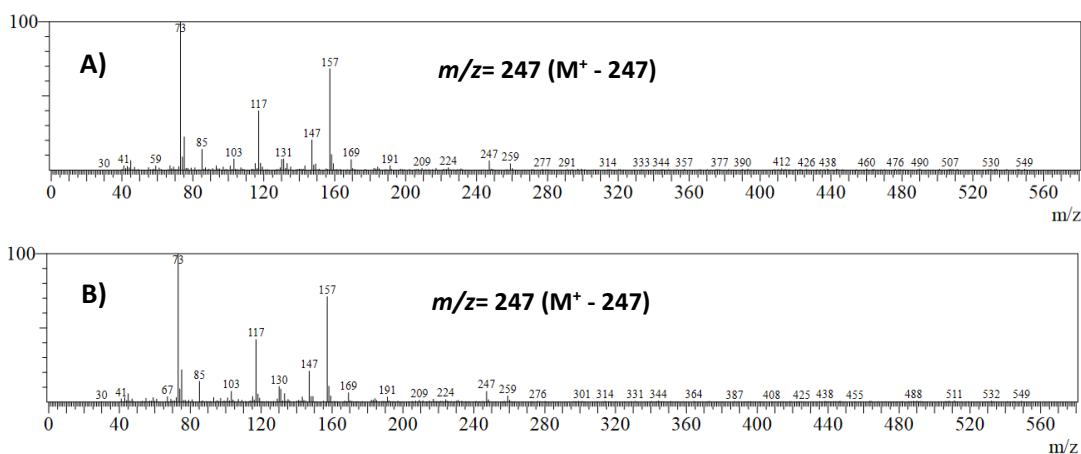

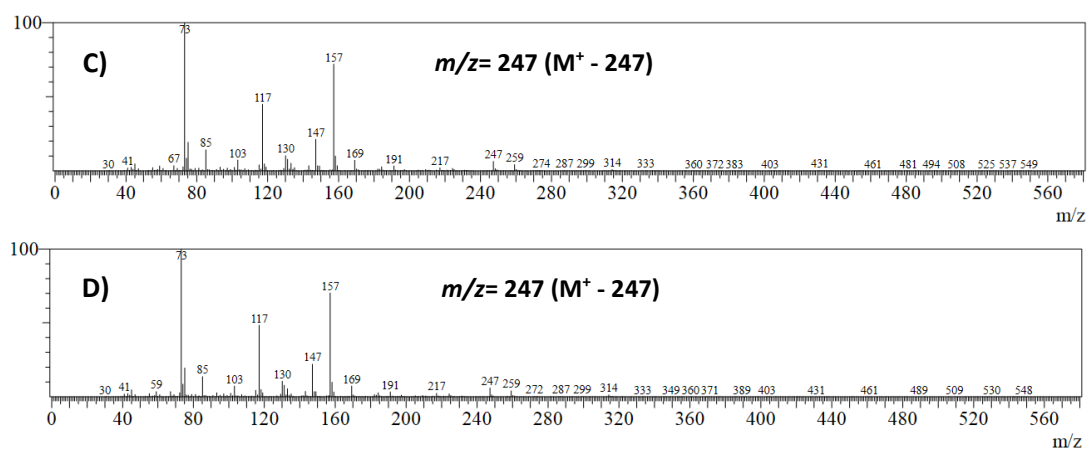

**Figure 3.** Fragmentation of peaks with retention time A) 20.213, B) 20.280, C) 20.354, D)20.403.

Diastereisomeric mixture

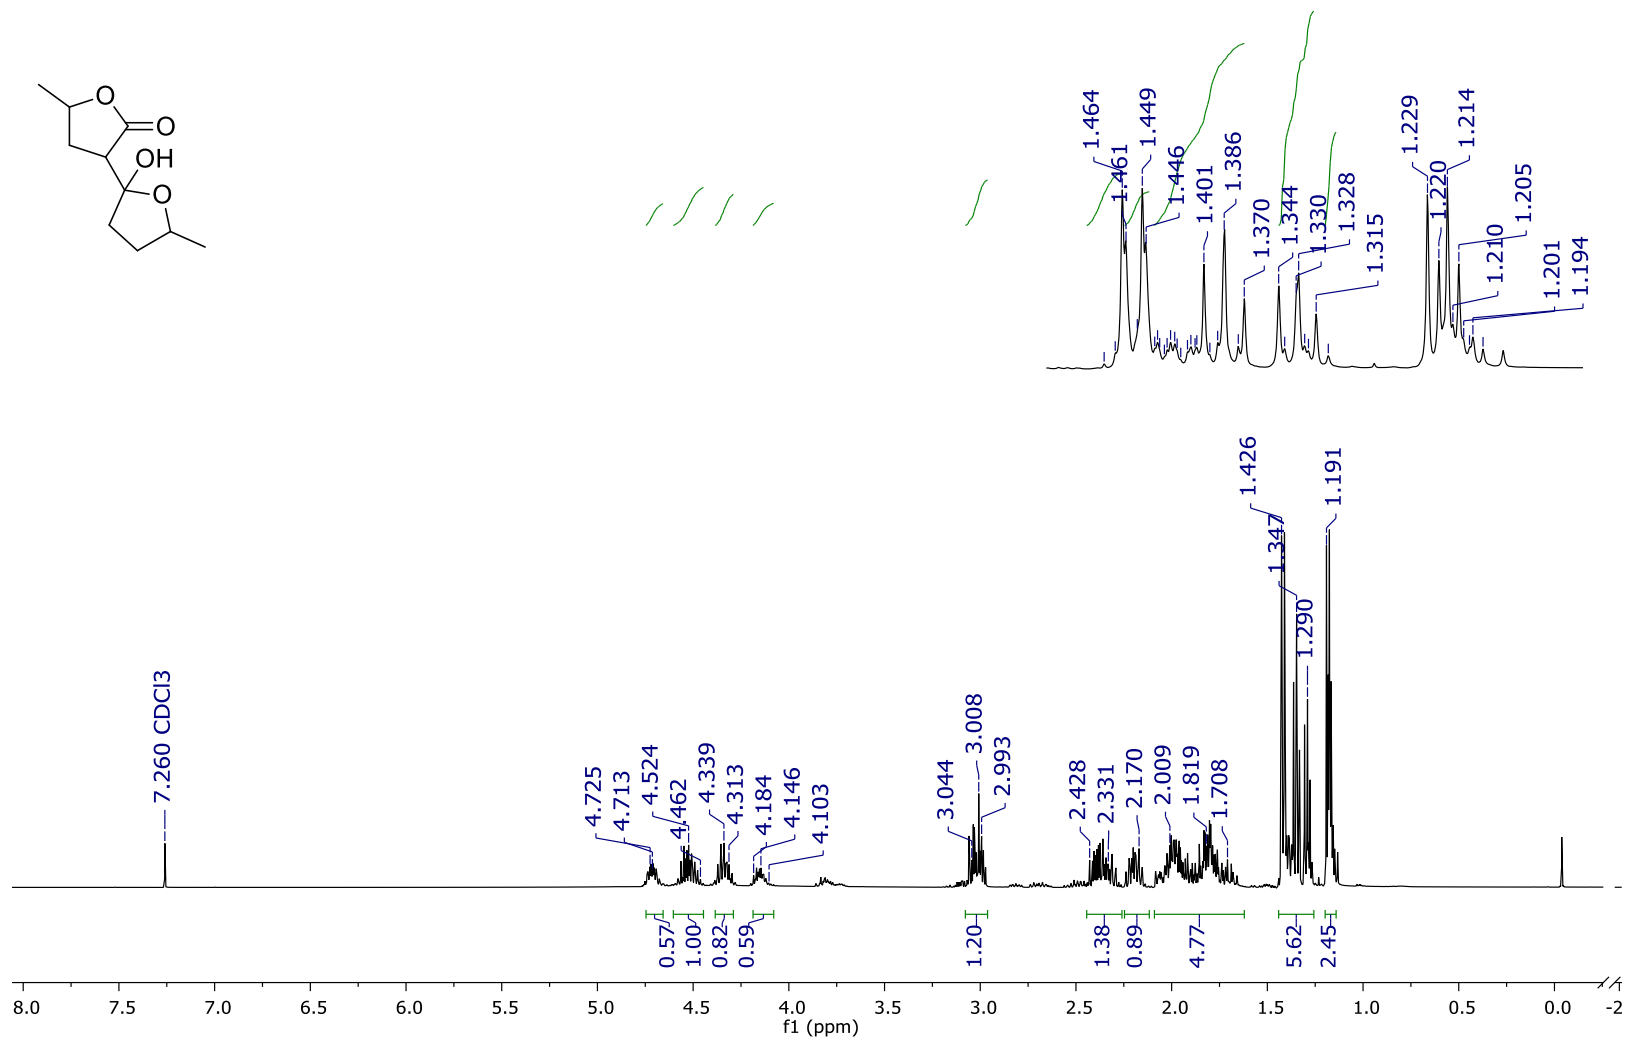

Diastereisomeric mixture

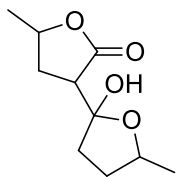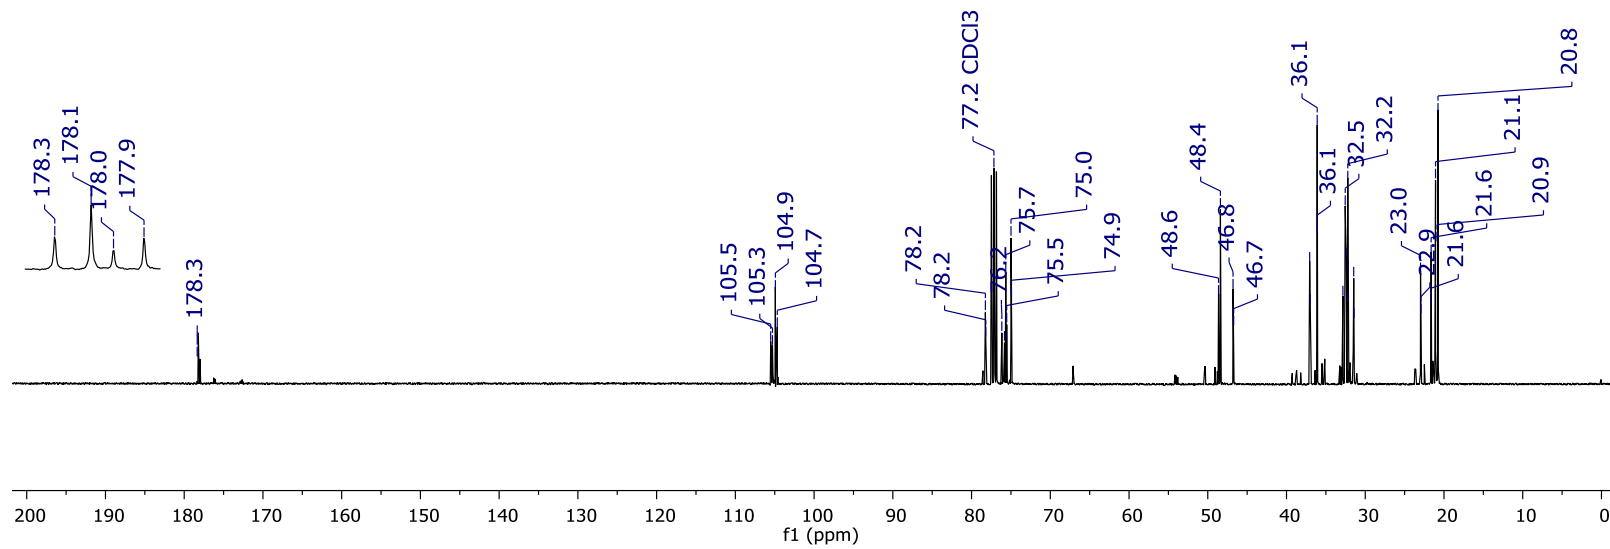

Diastereisomeric mixture

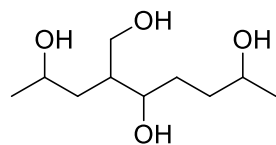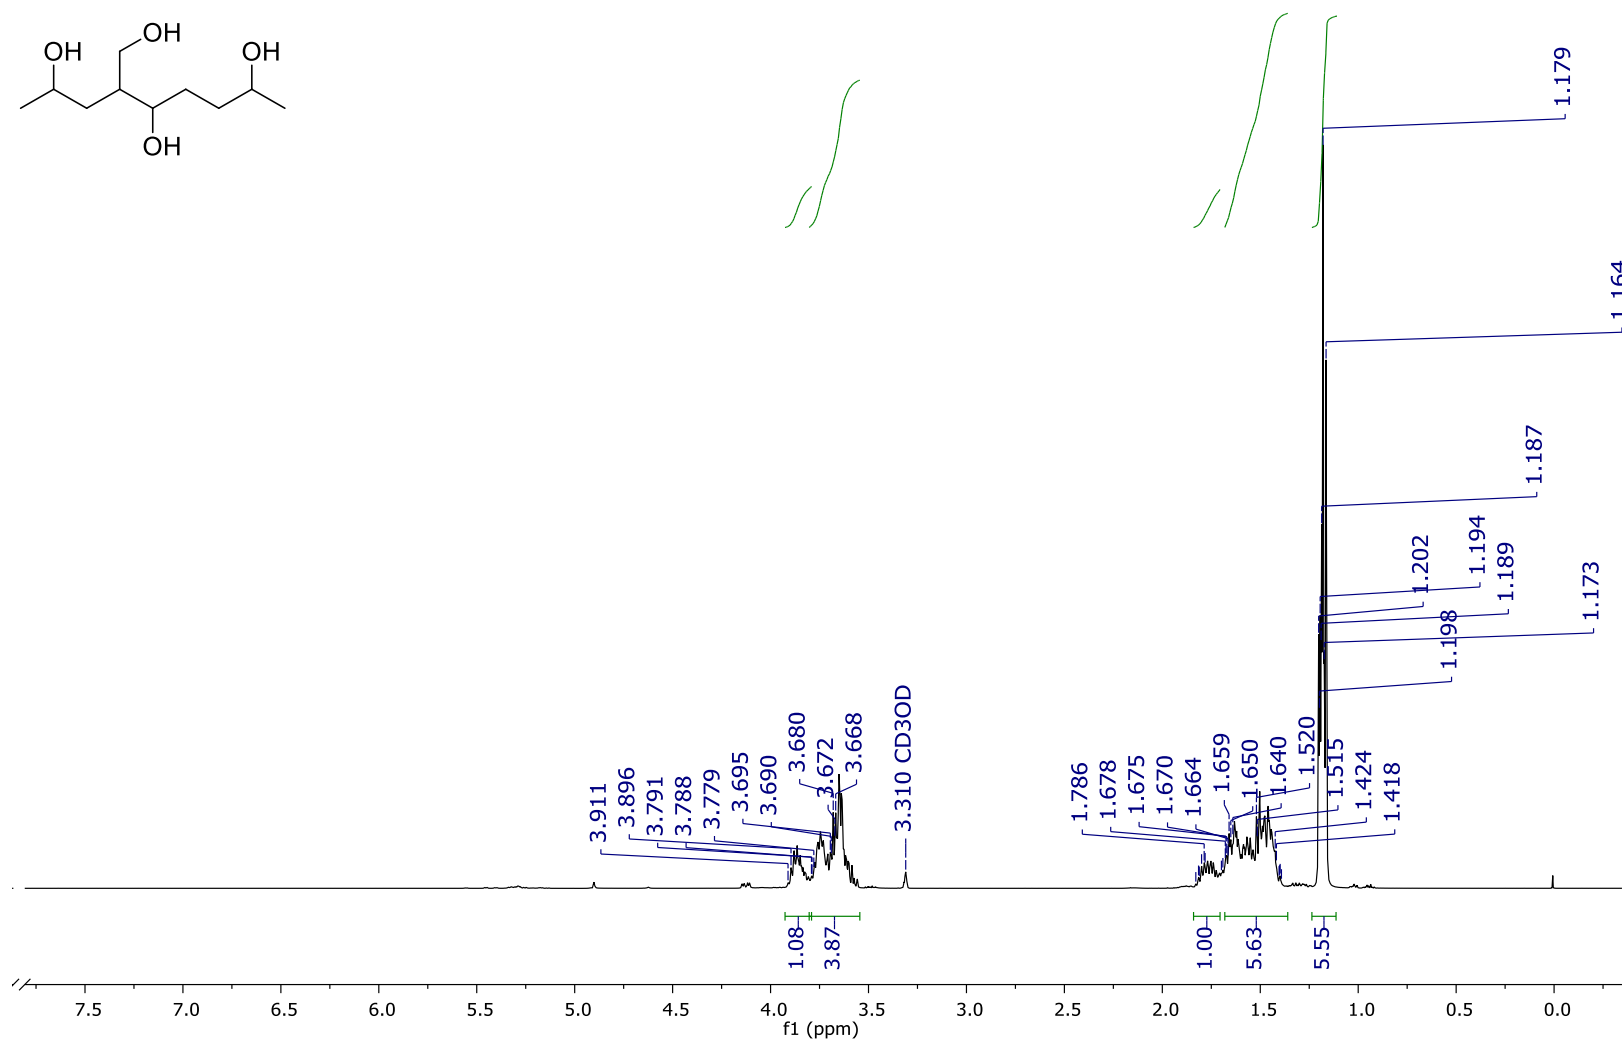

Diastereisomeric mixture

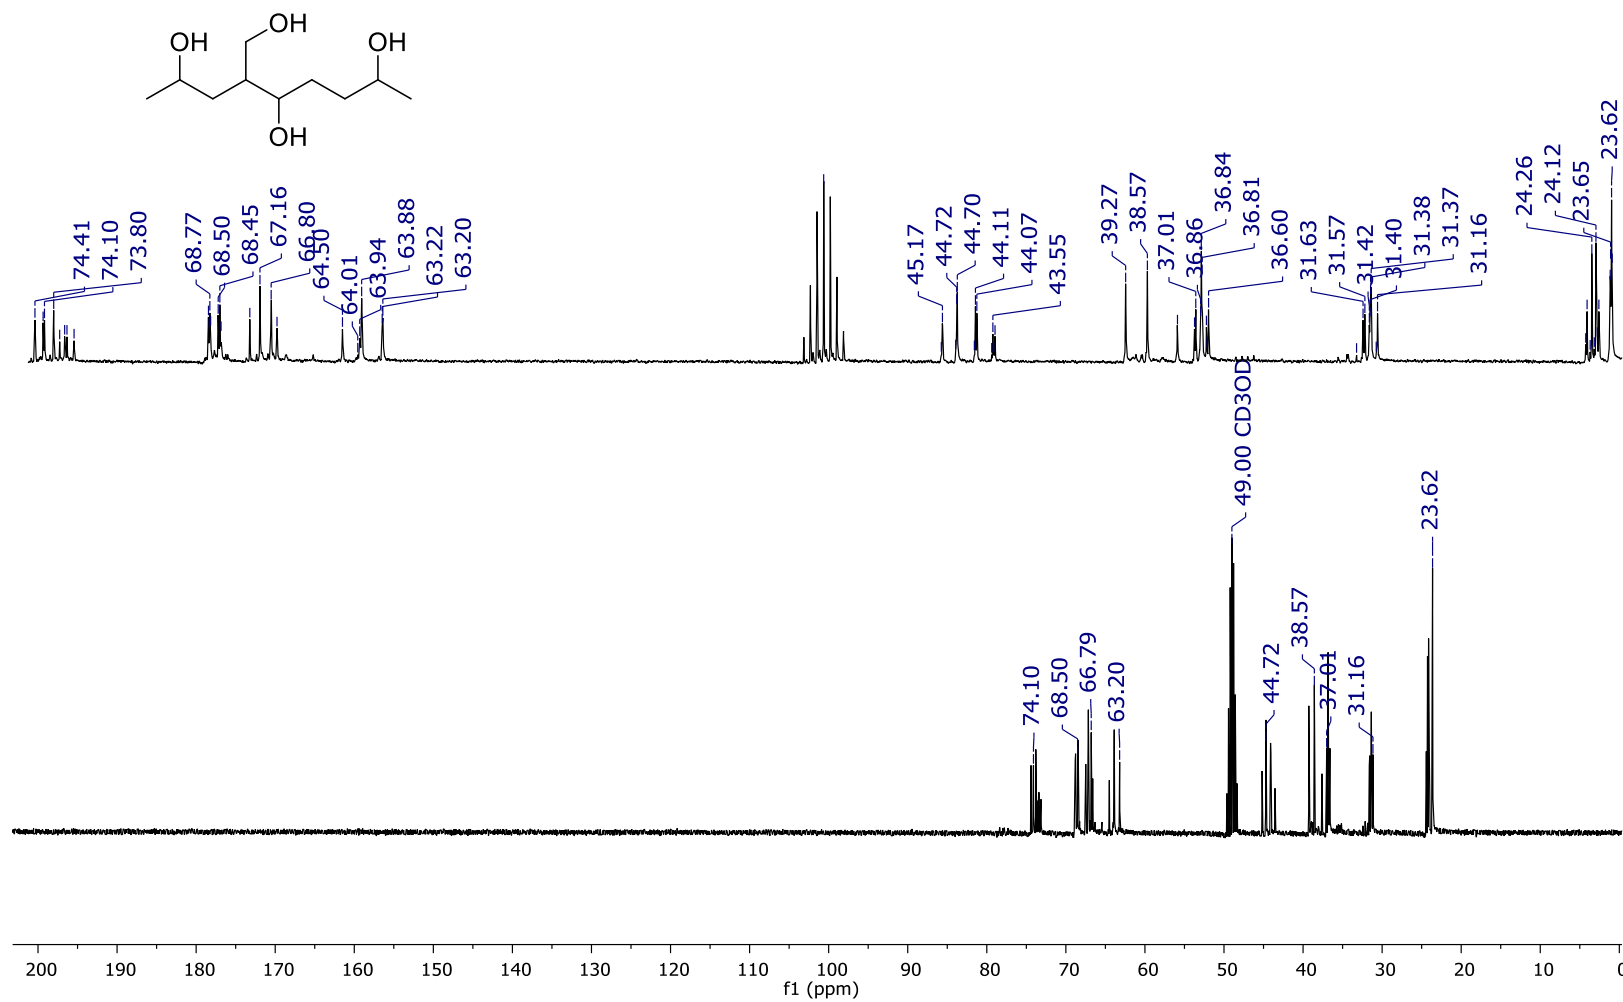

Diastereoisomeric mixture

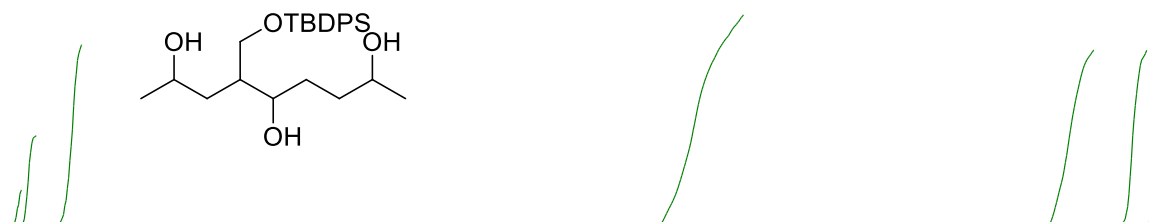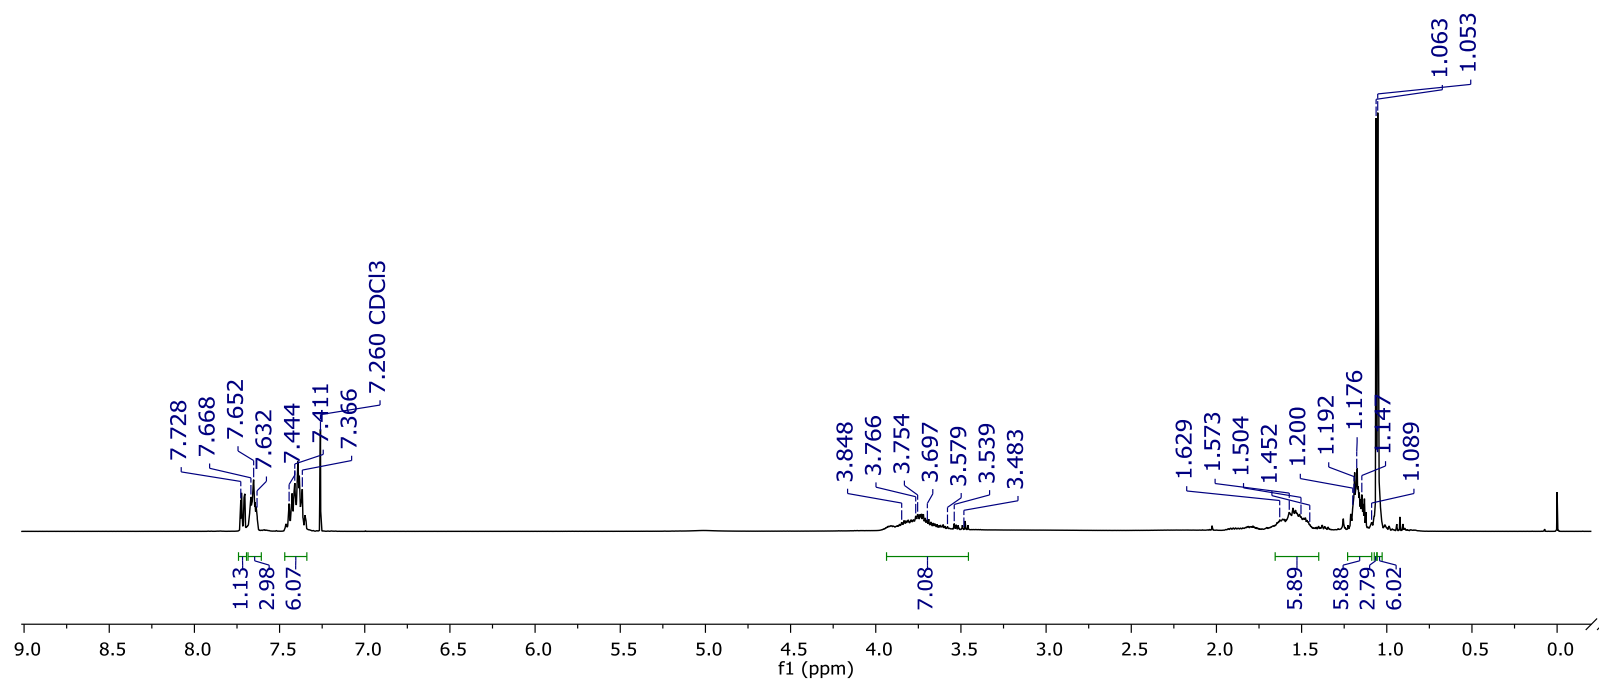



CC(O)CC(CO)CC(CO)CC(CO)COTBDPS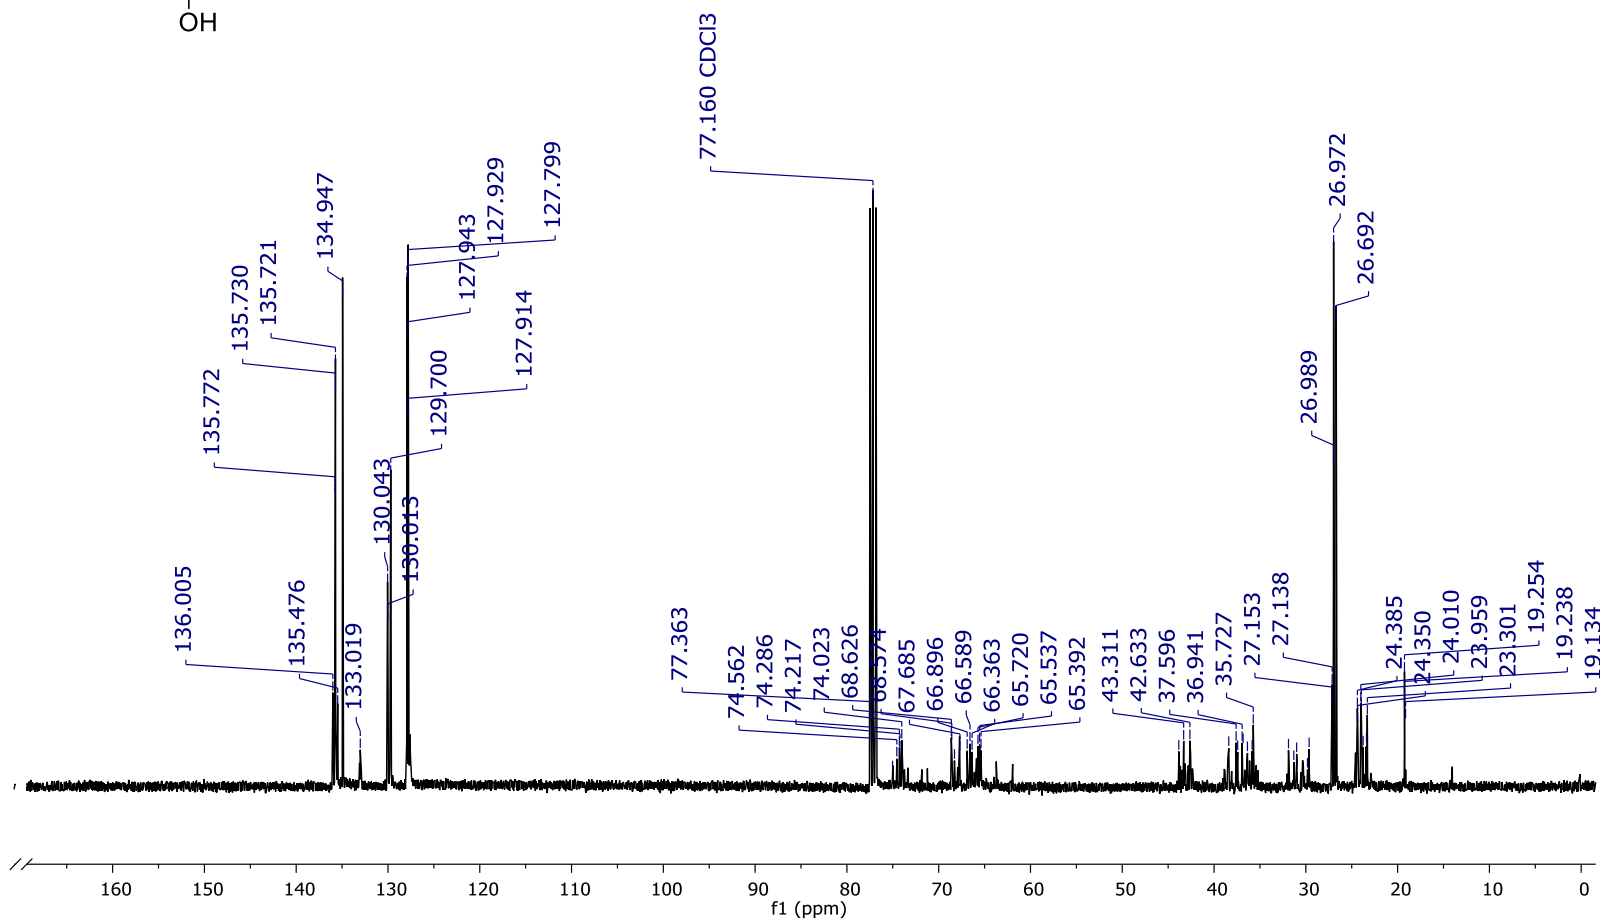

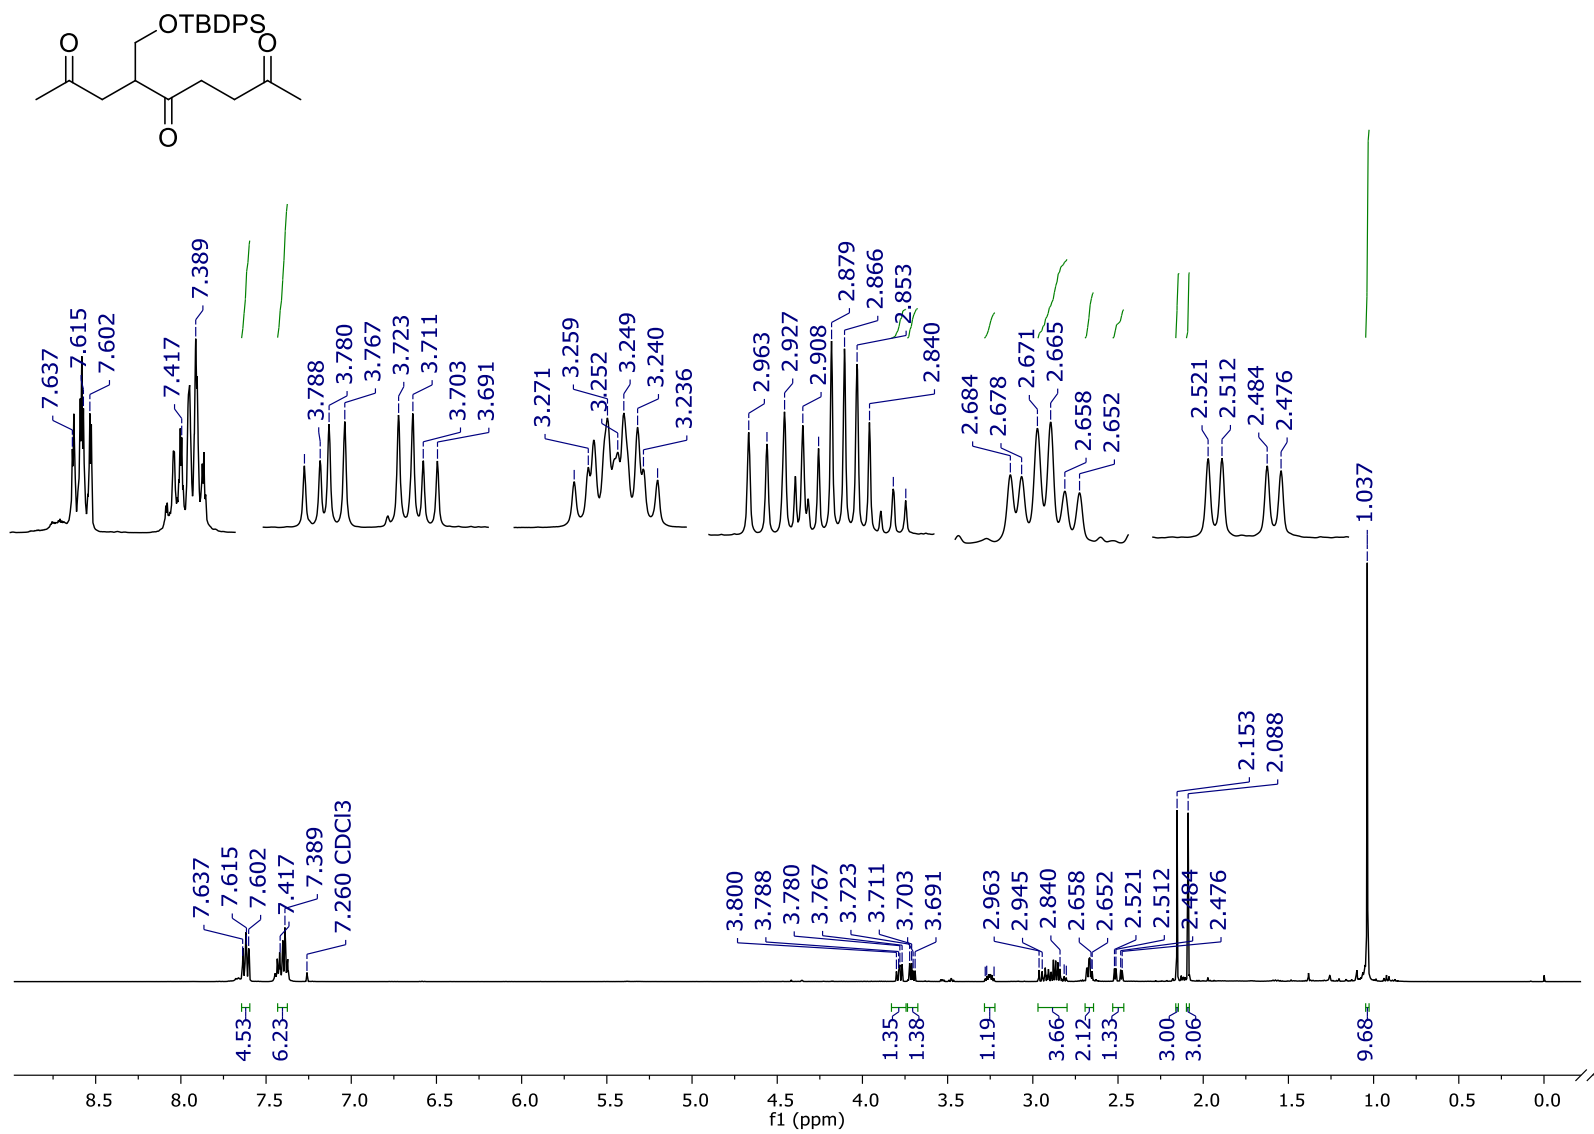

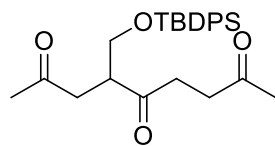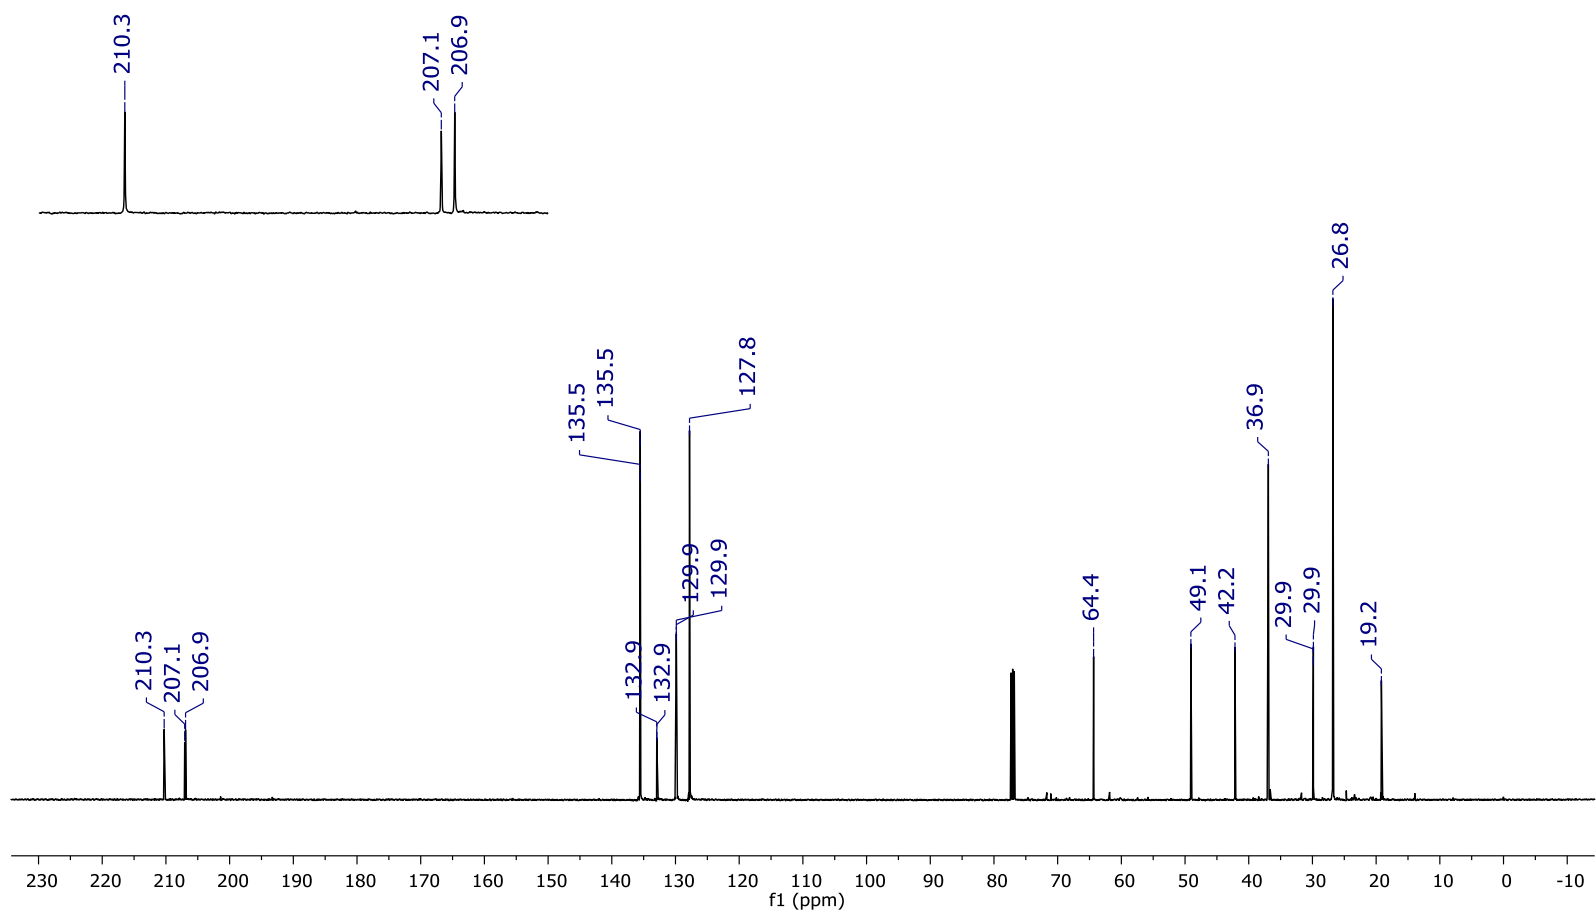

Diastereisomeric mixture

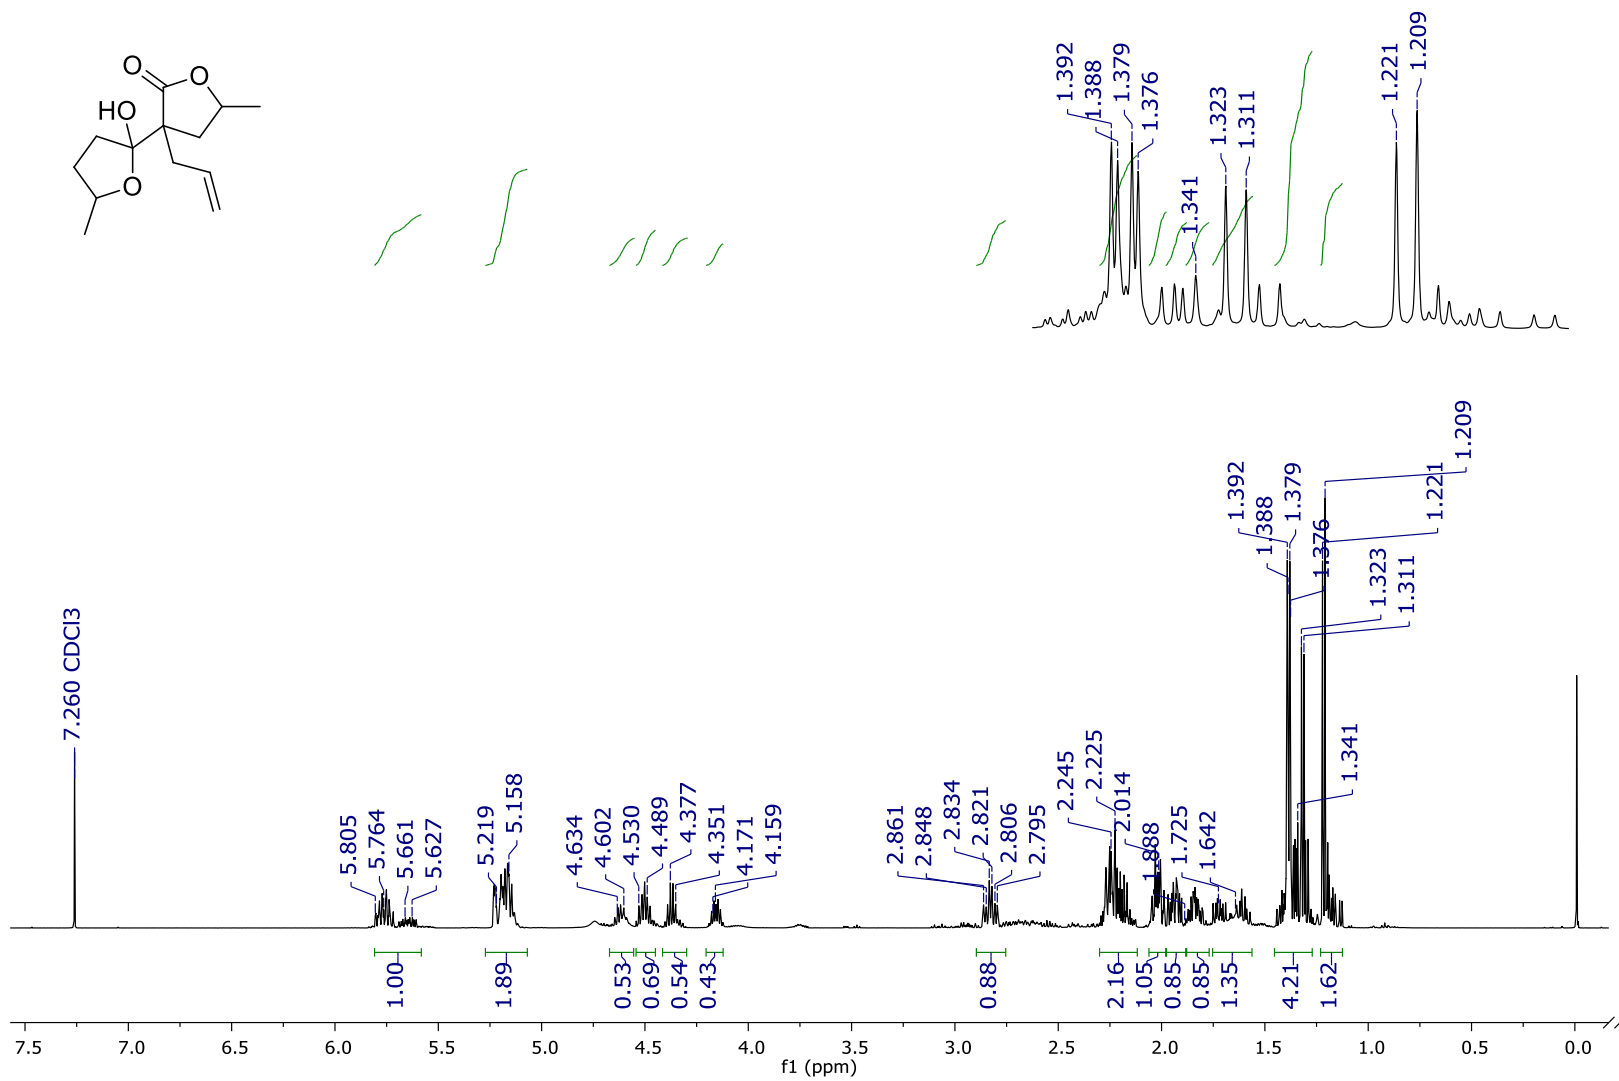

Diastereisomeric mixture

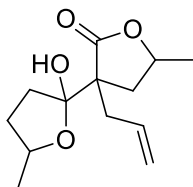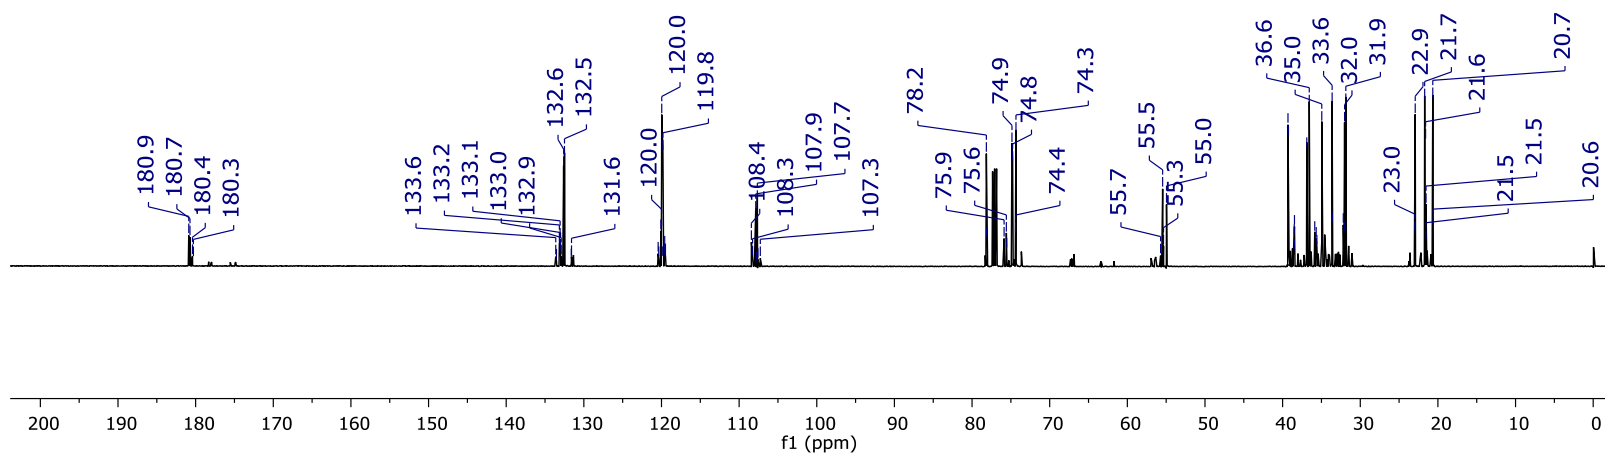

Diastereisomeric mixture

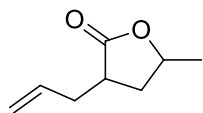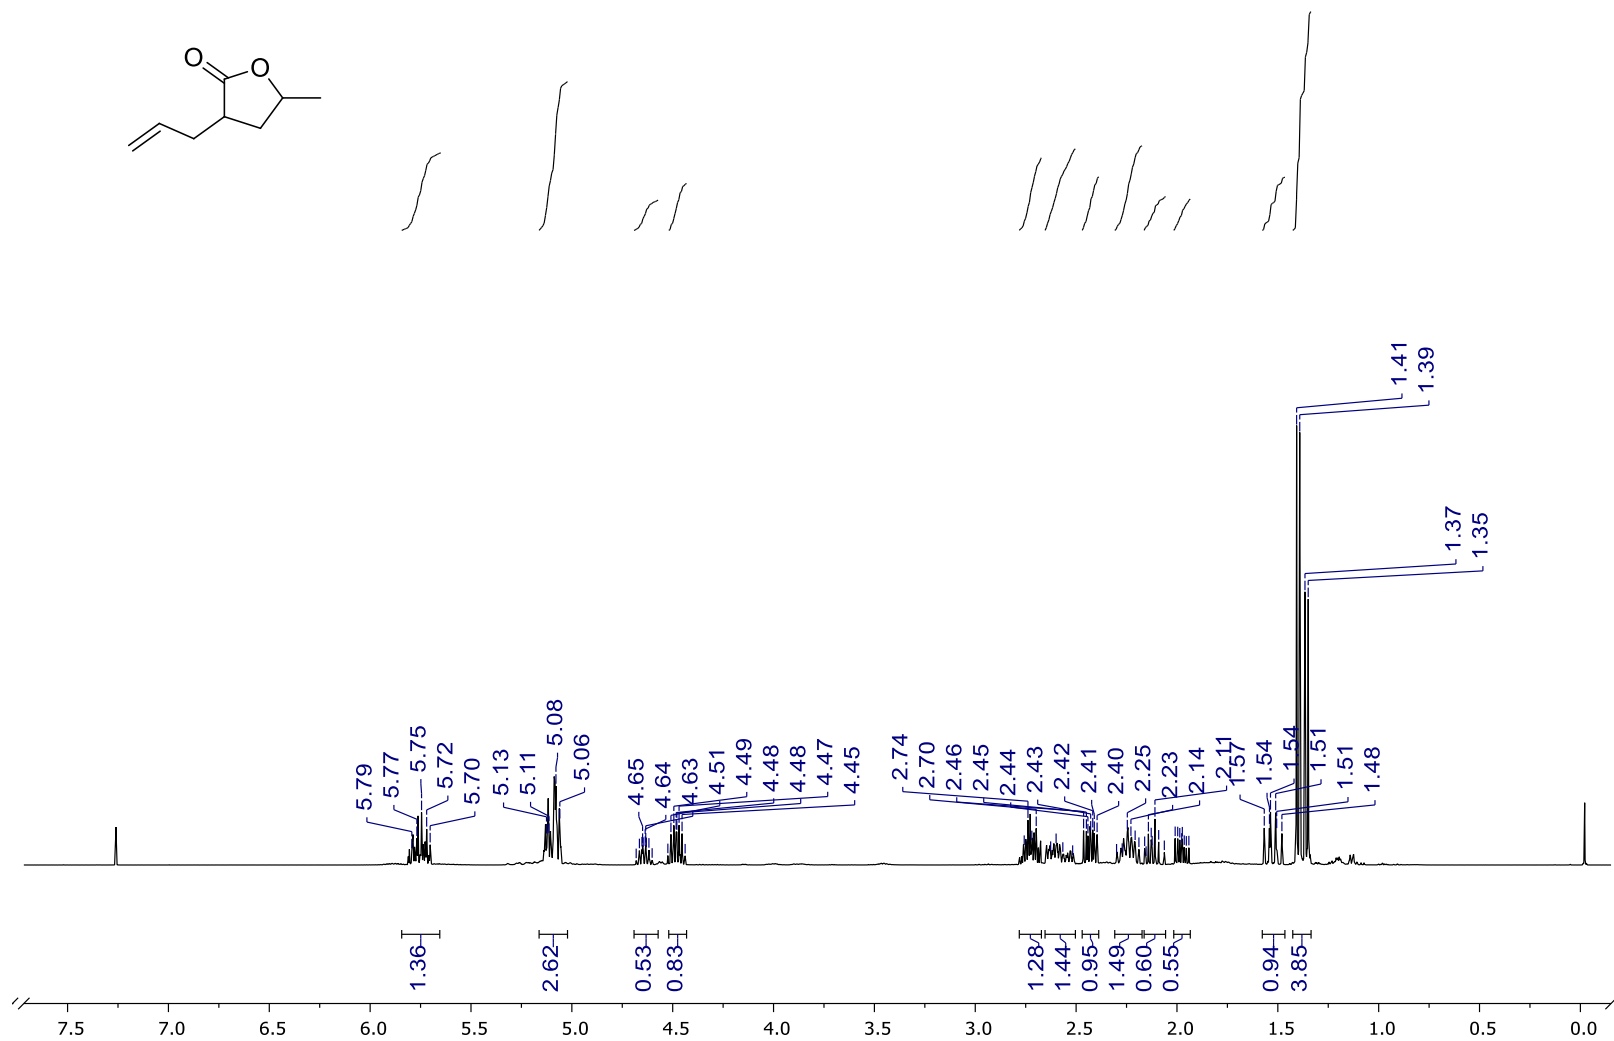

Diastereisomeric mixture

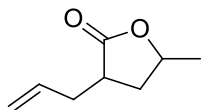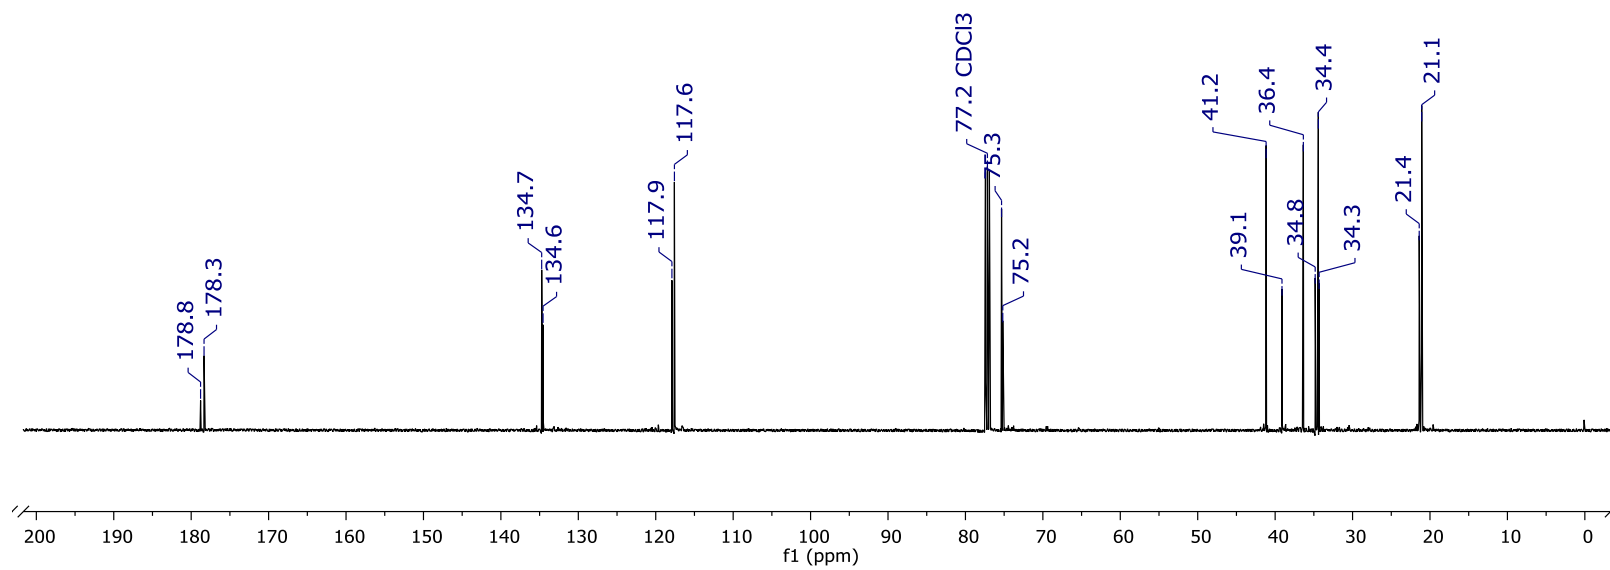

Diastereisomeric mixture

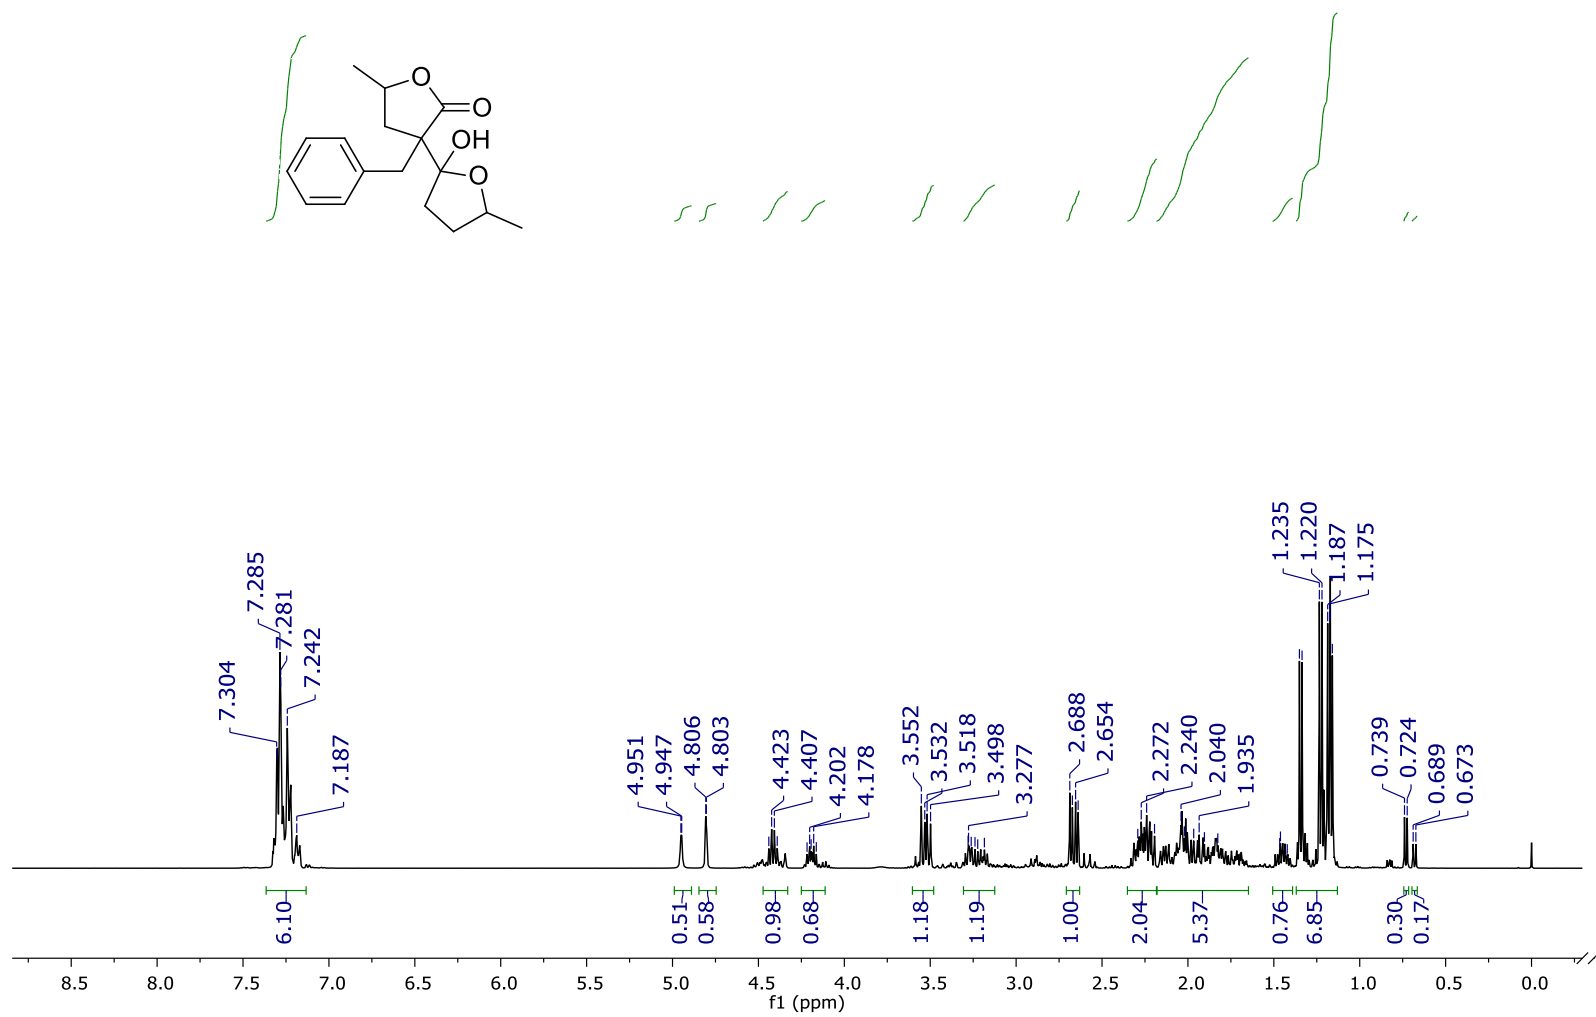



Diastereisomeric mixture

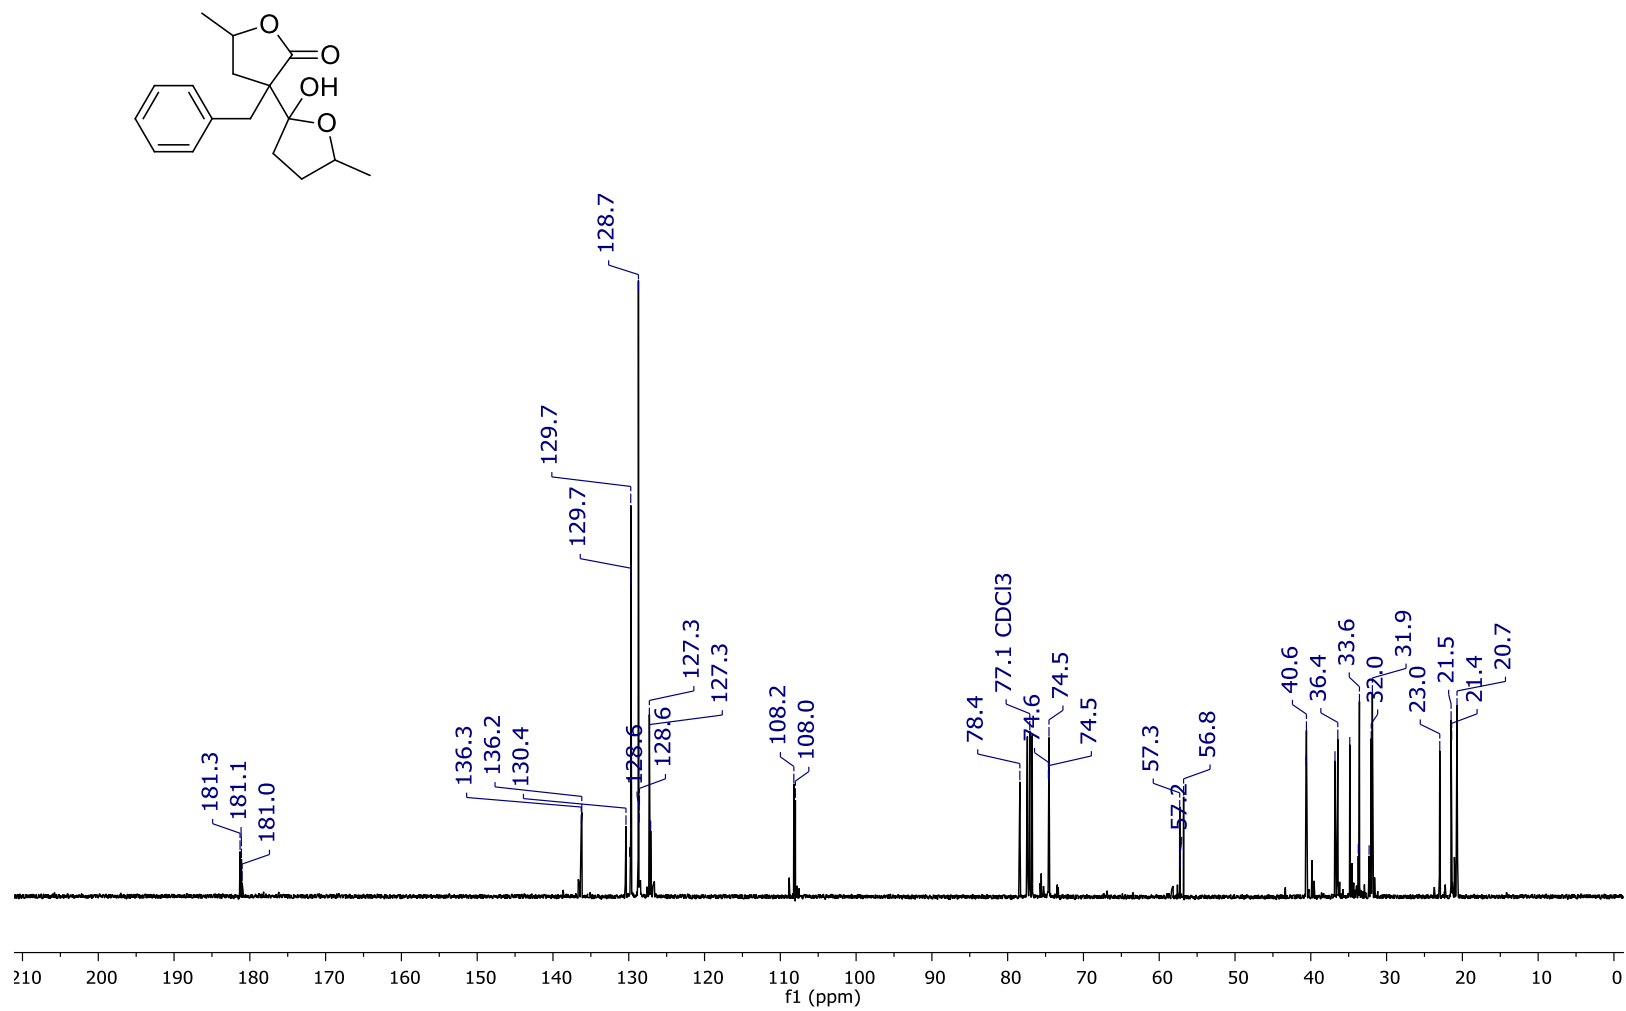

Diastereisomeric mixture

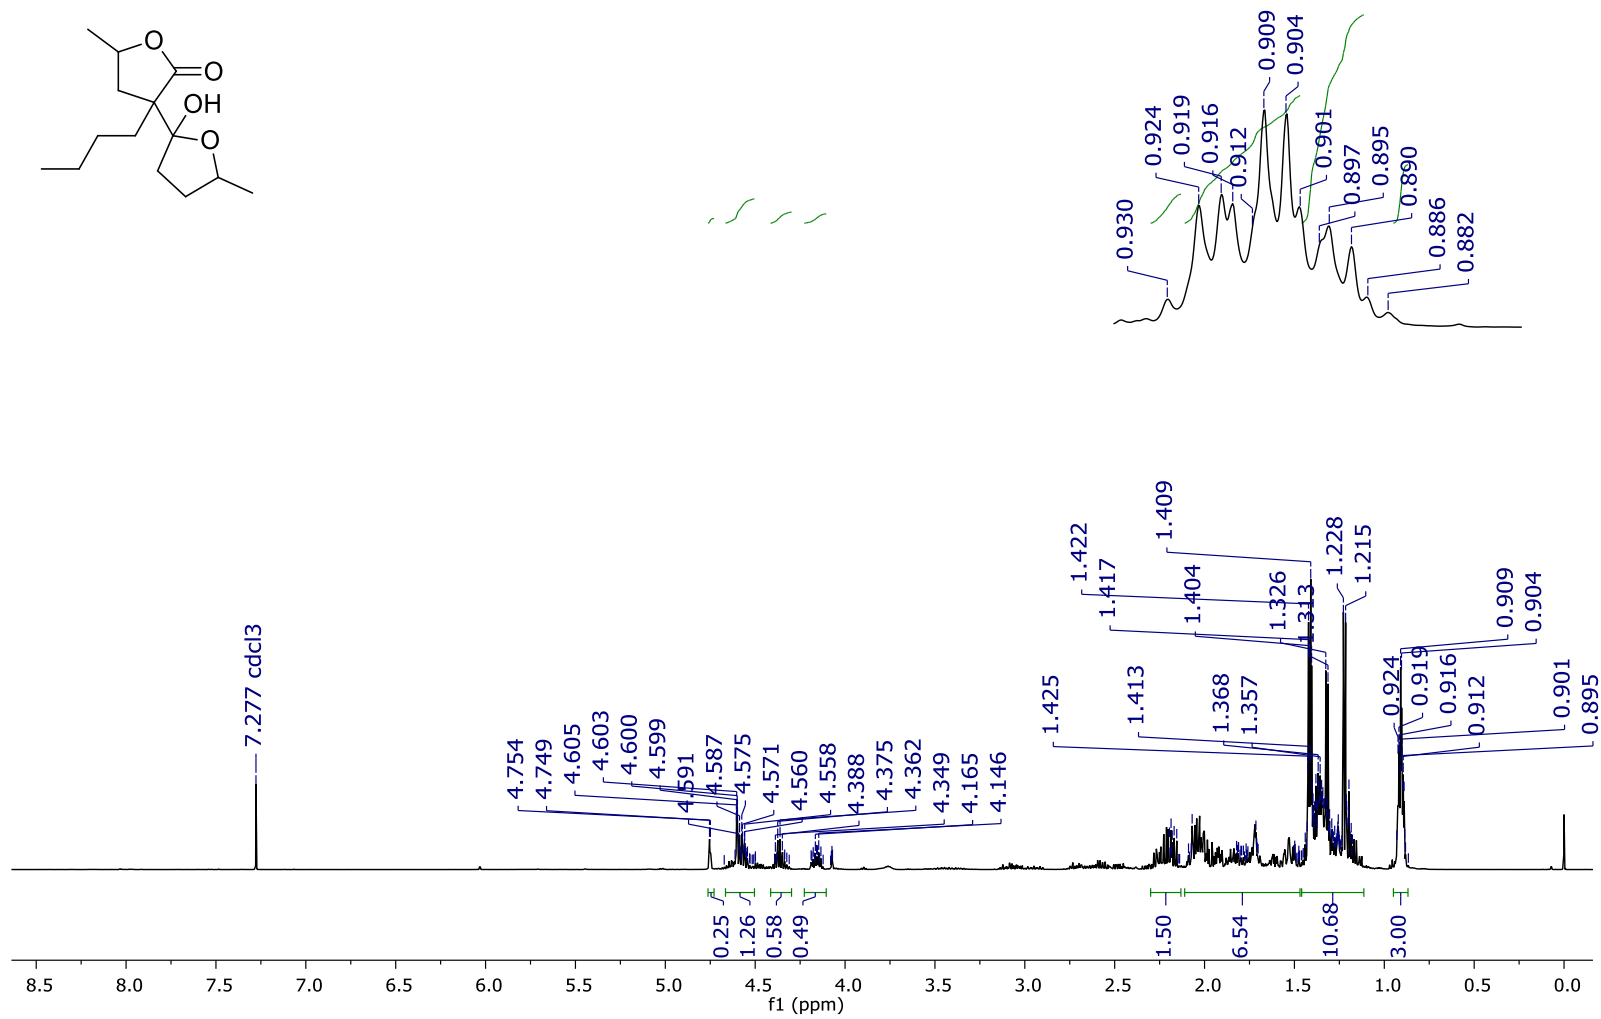

Diastereisomeric mixture

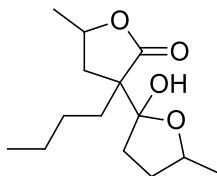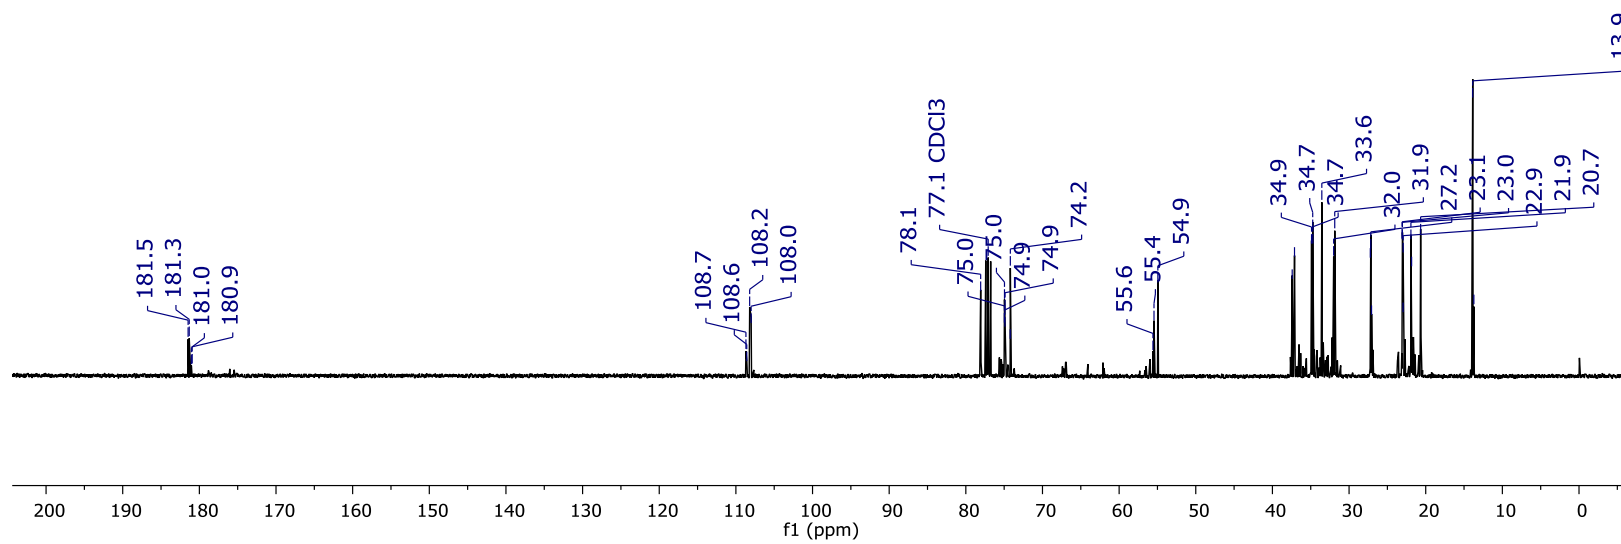

Diastereisomeric mixture

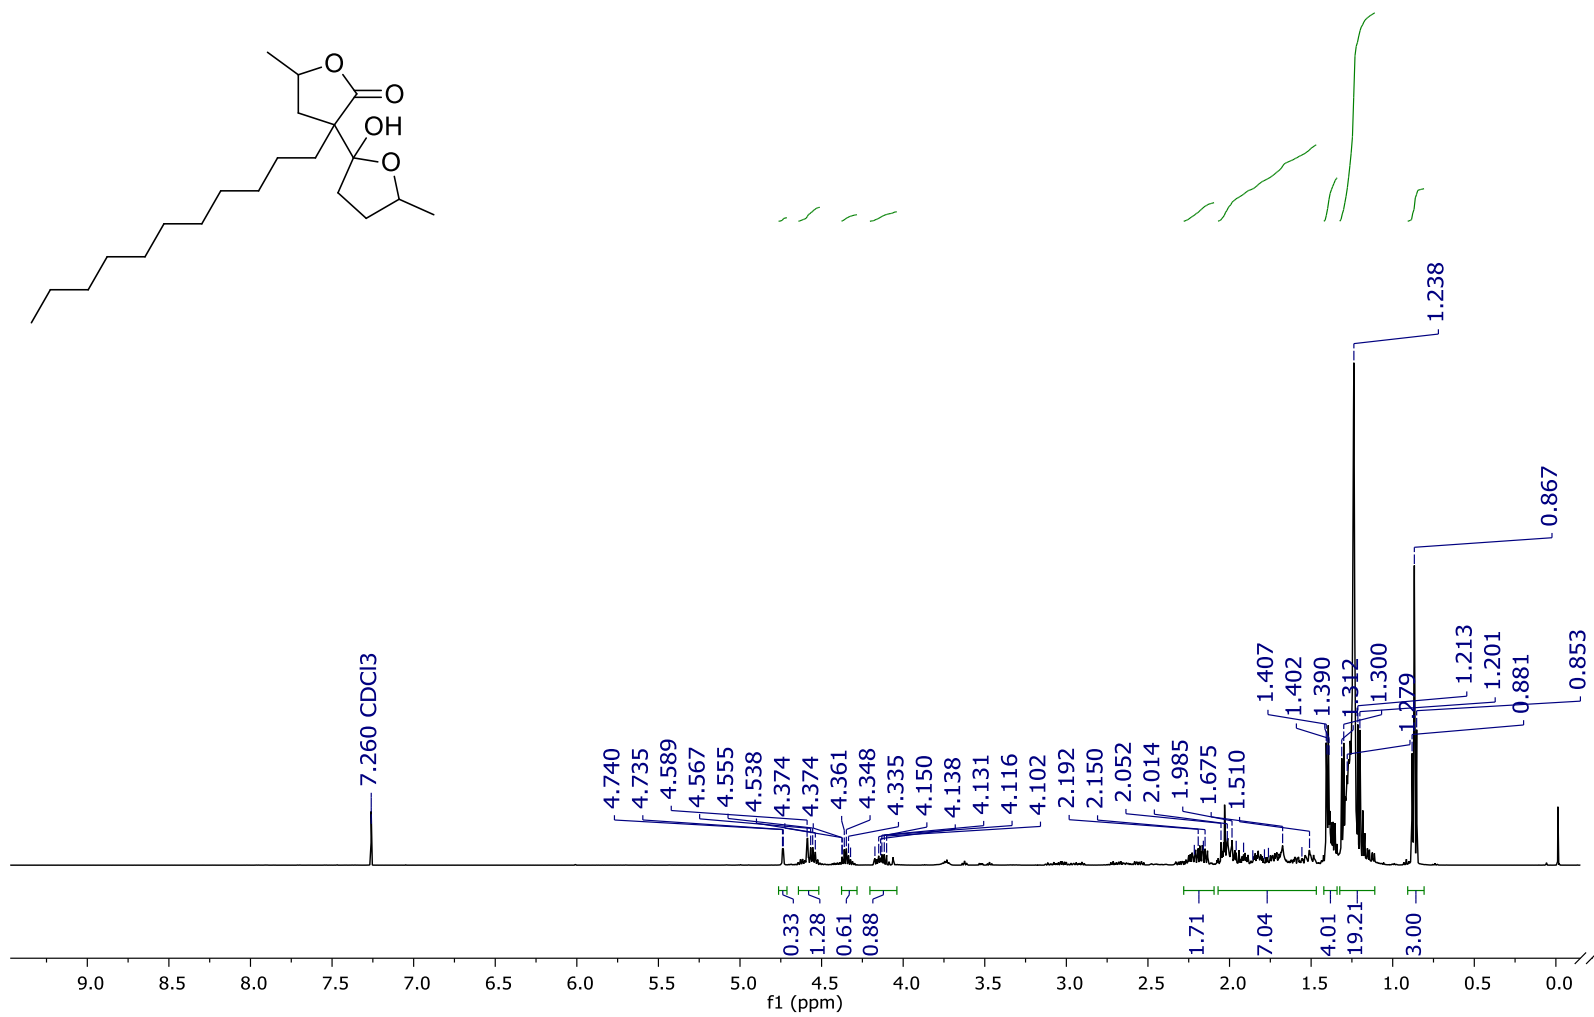

Diastereisomeric mixture

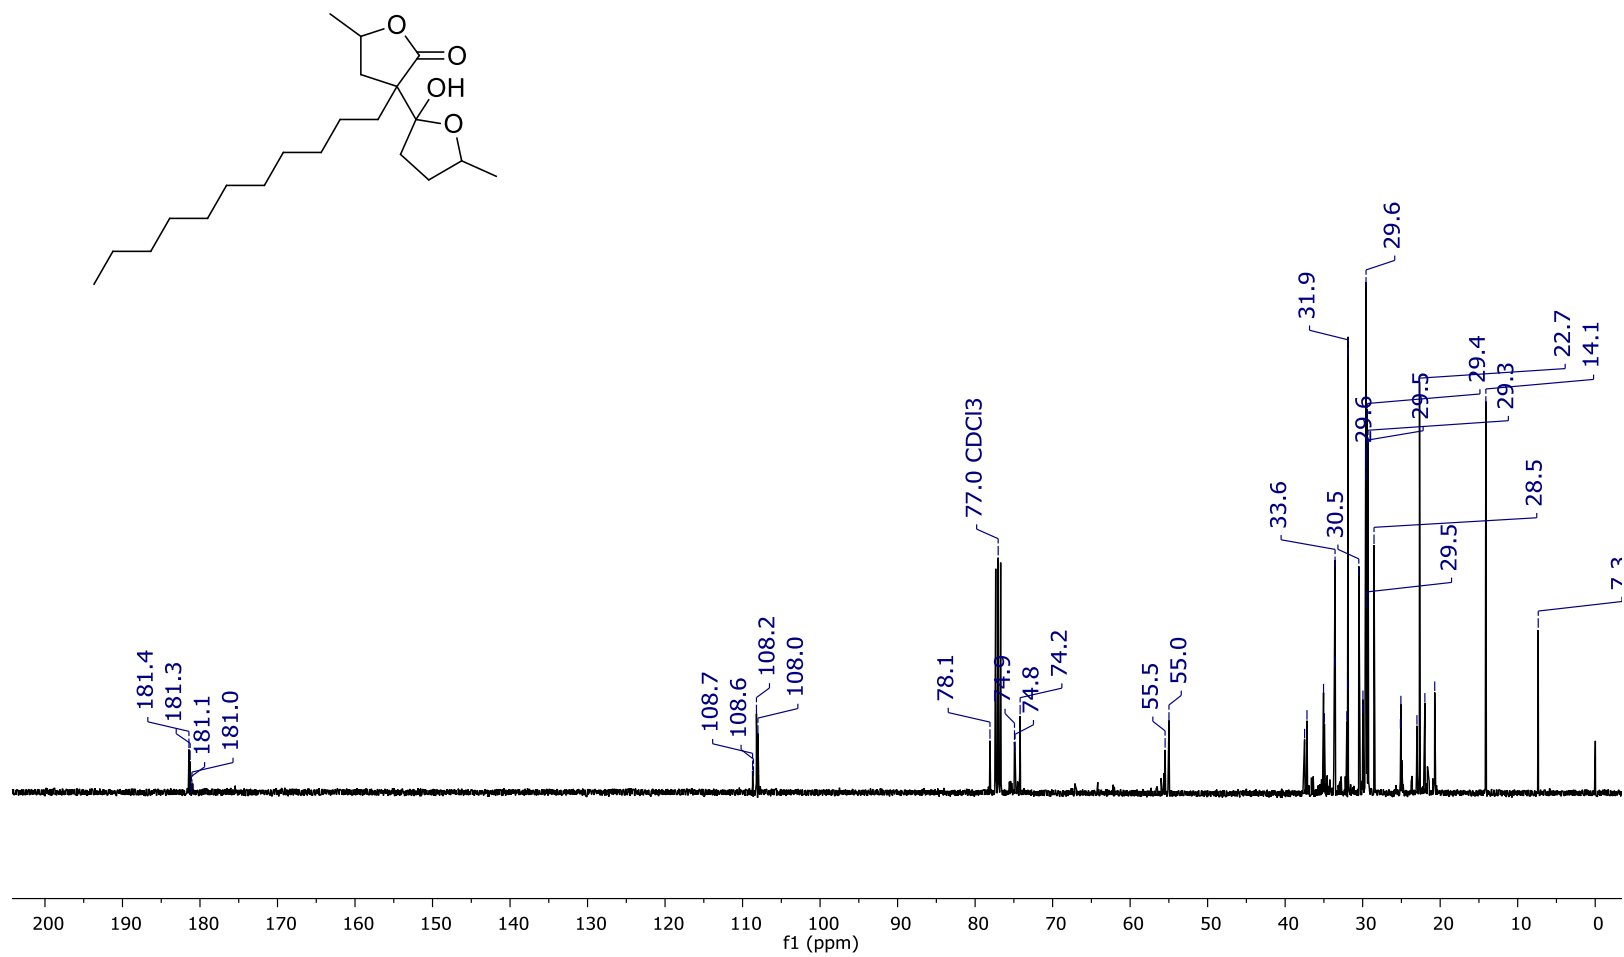

Diastereisomeric mixture

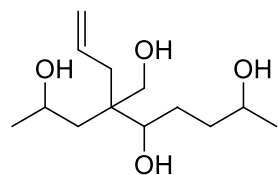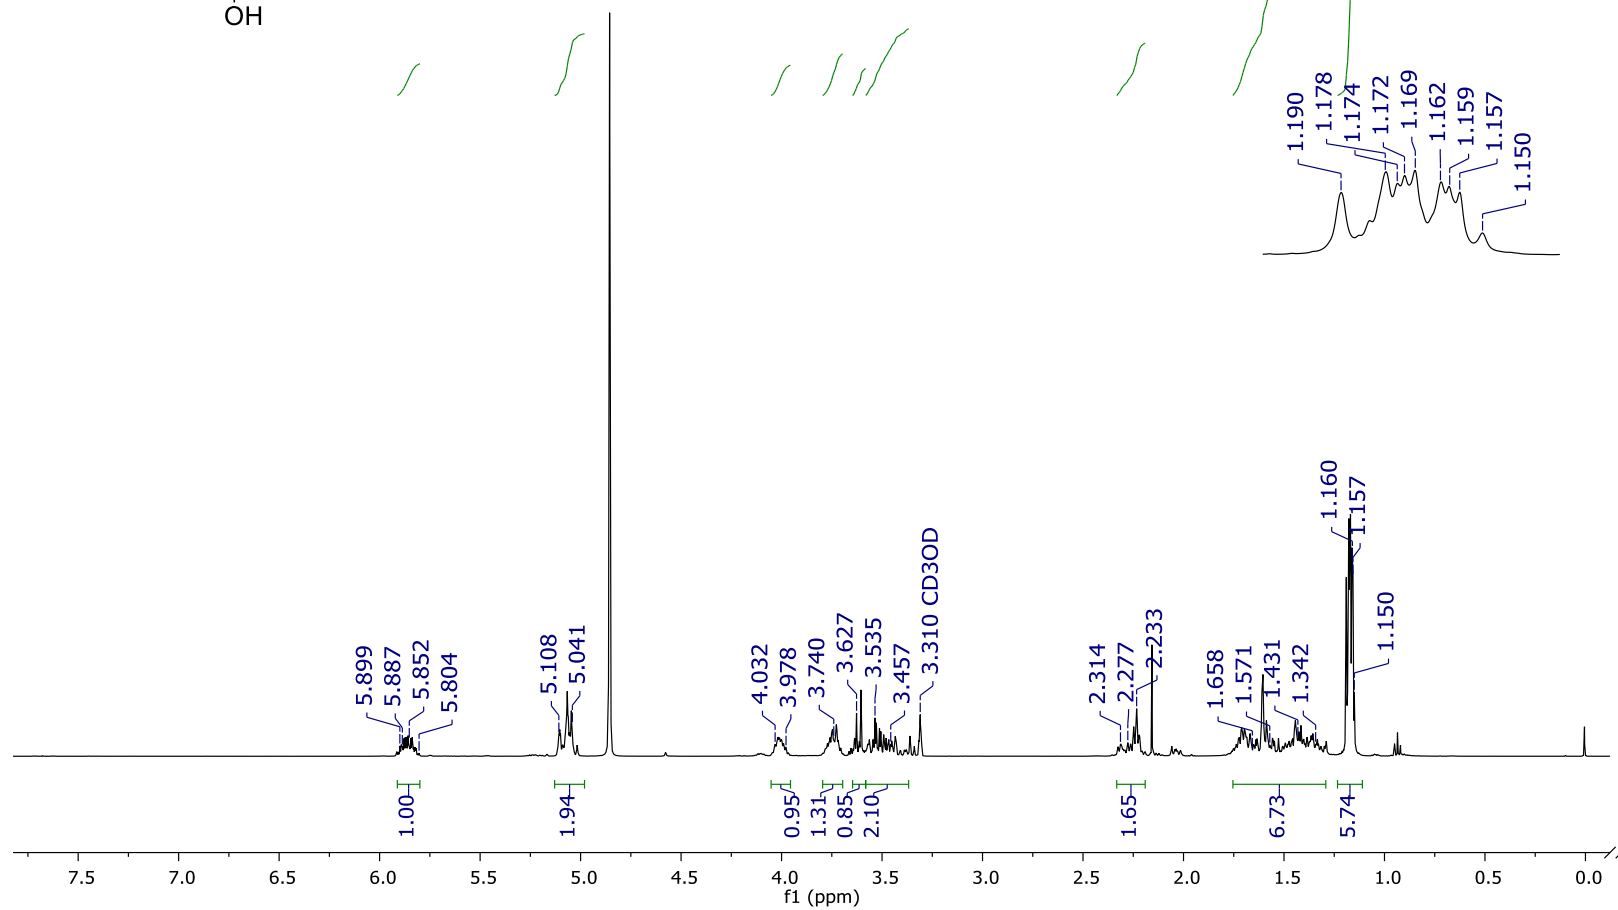

Diastereisomeric mixture

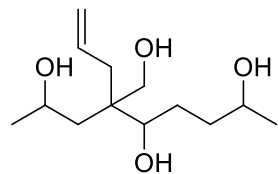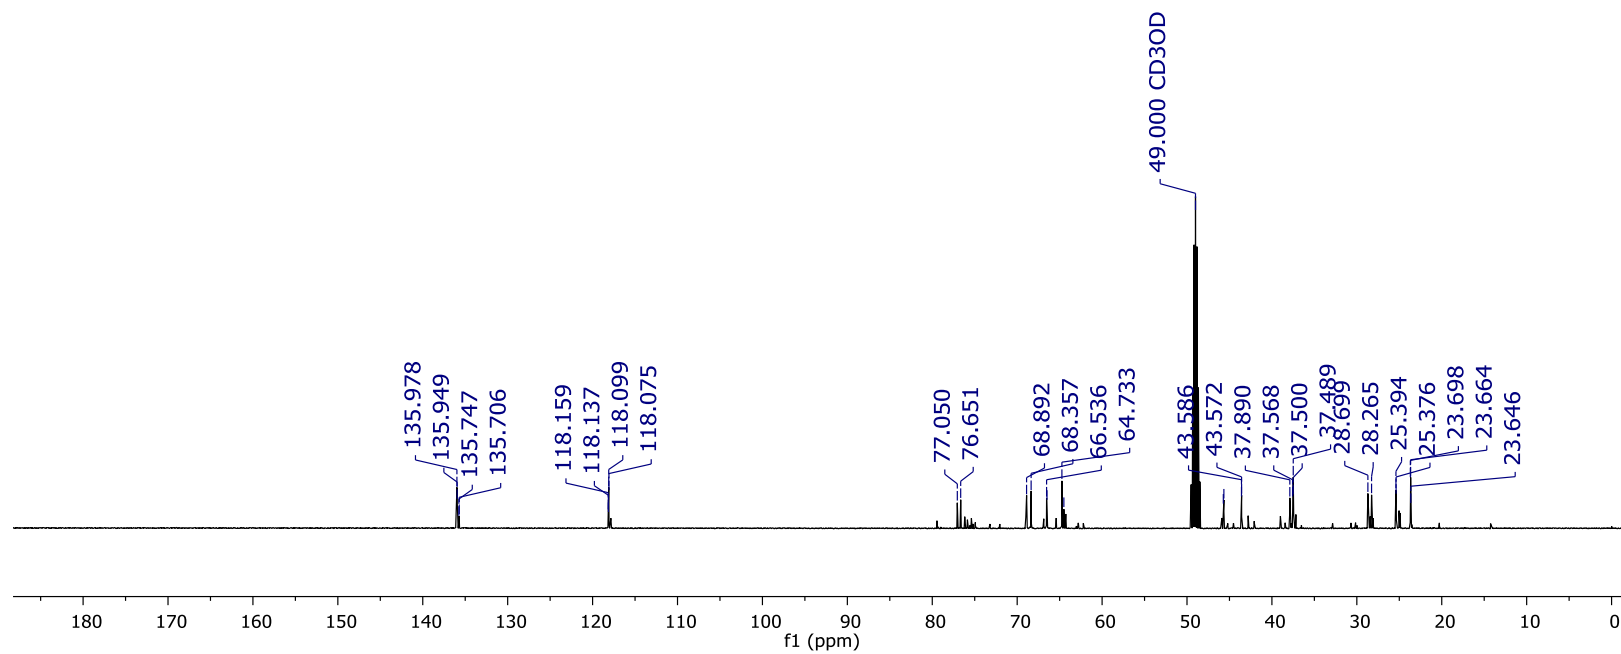

Diastereisomeric mixture

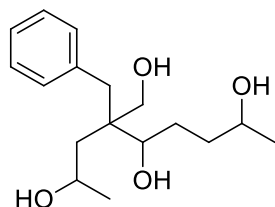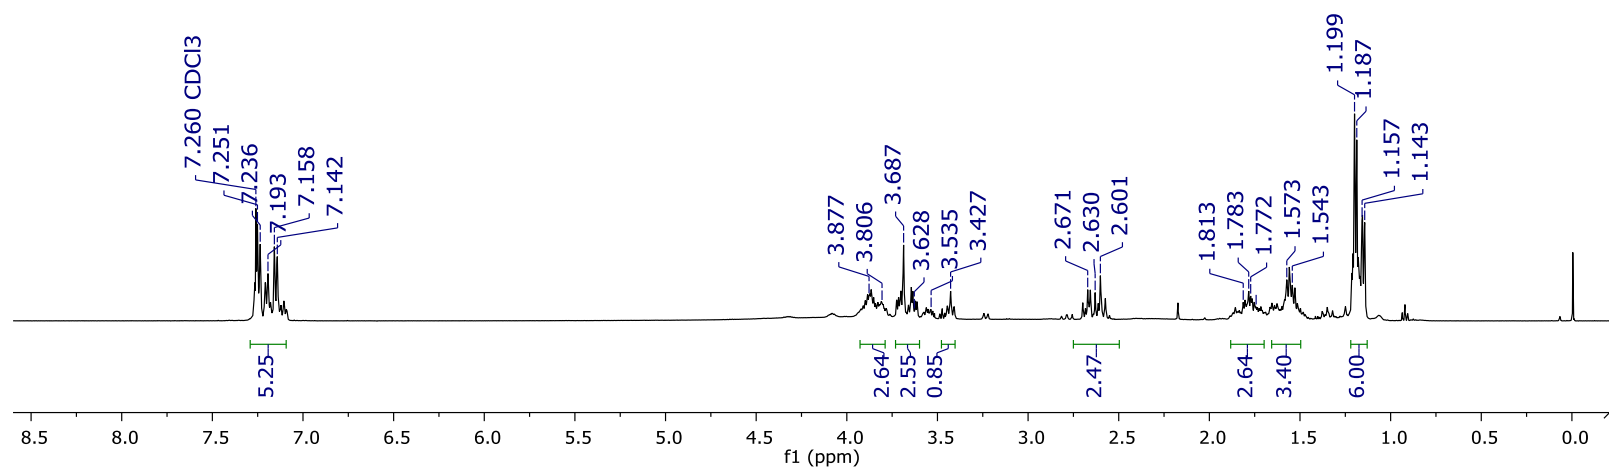



Diastereisomeric mixture

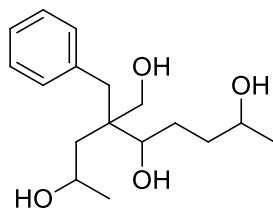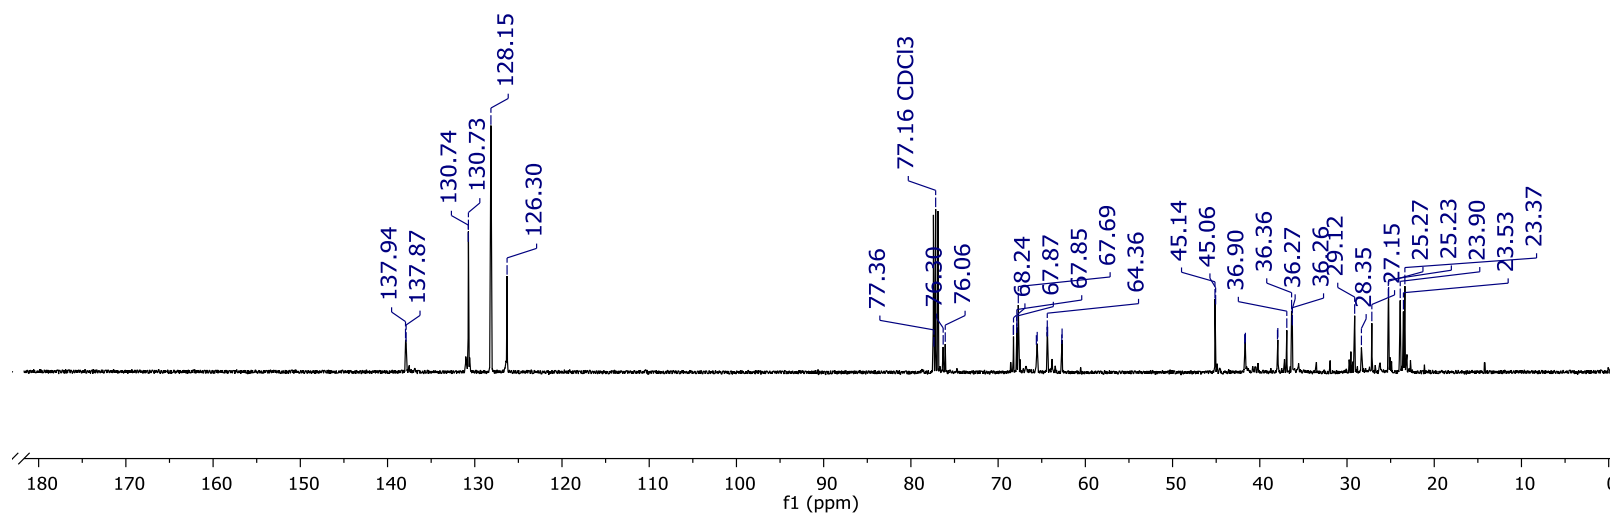

Diastereisomeric mixture

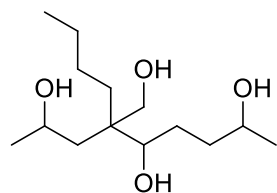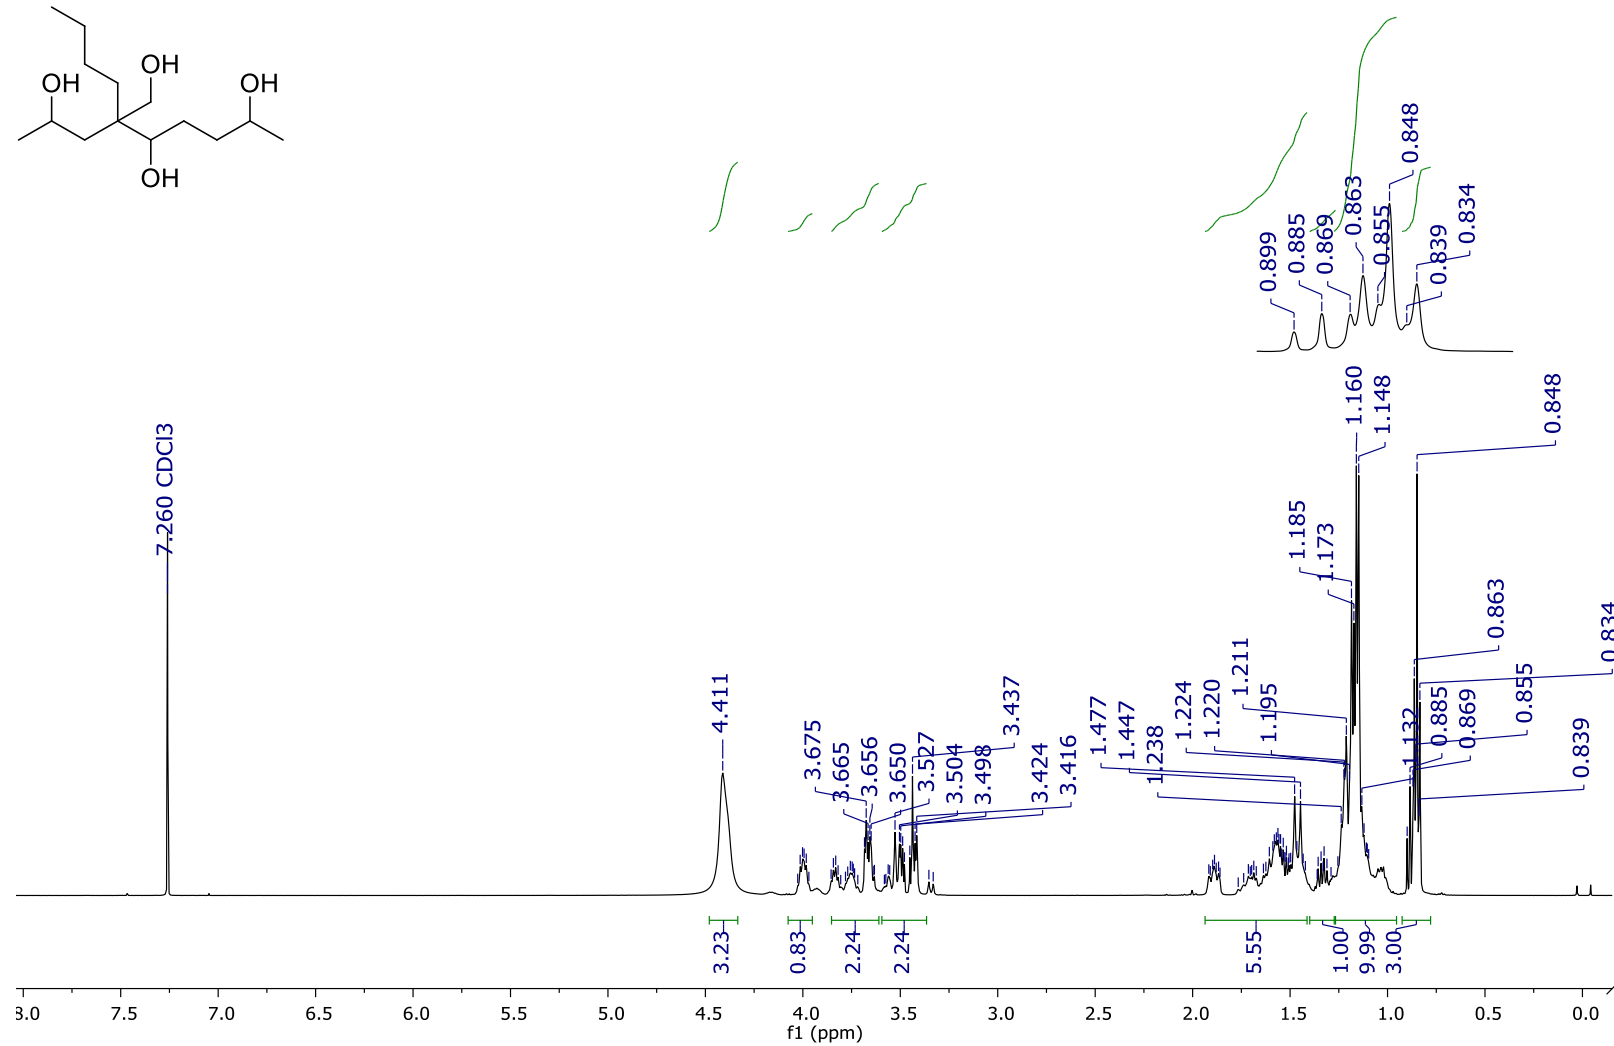

Diastereisomeric mixture

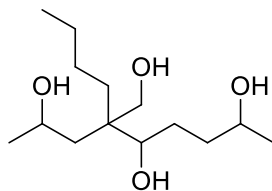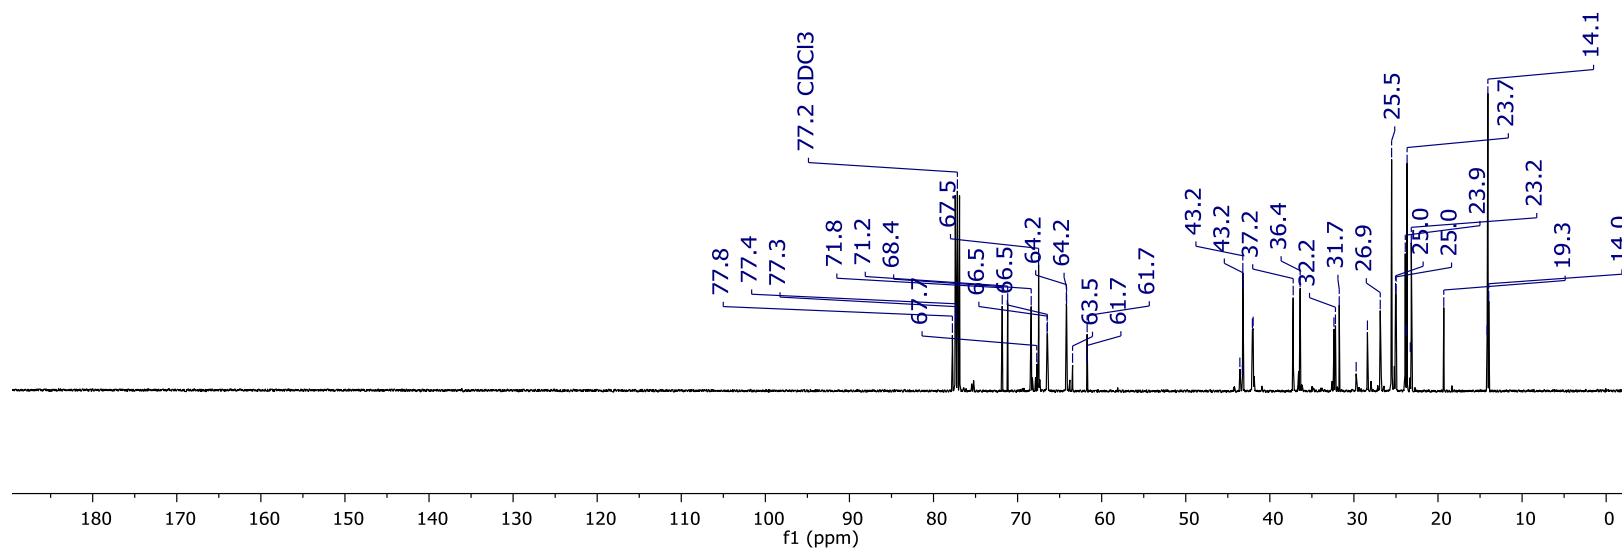



Diastereisomeric mixture

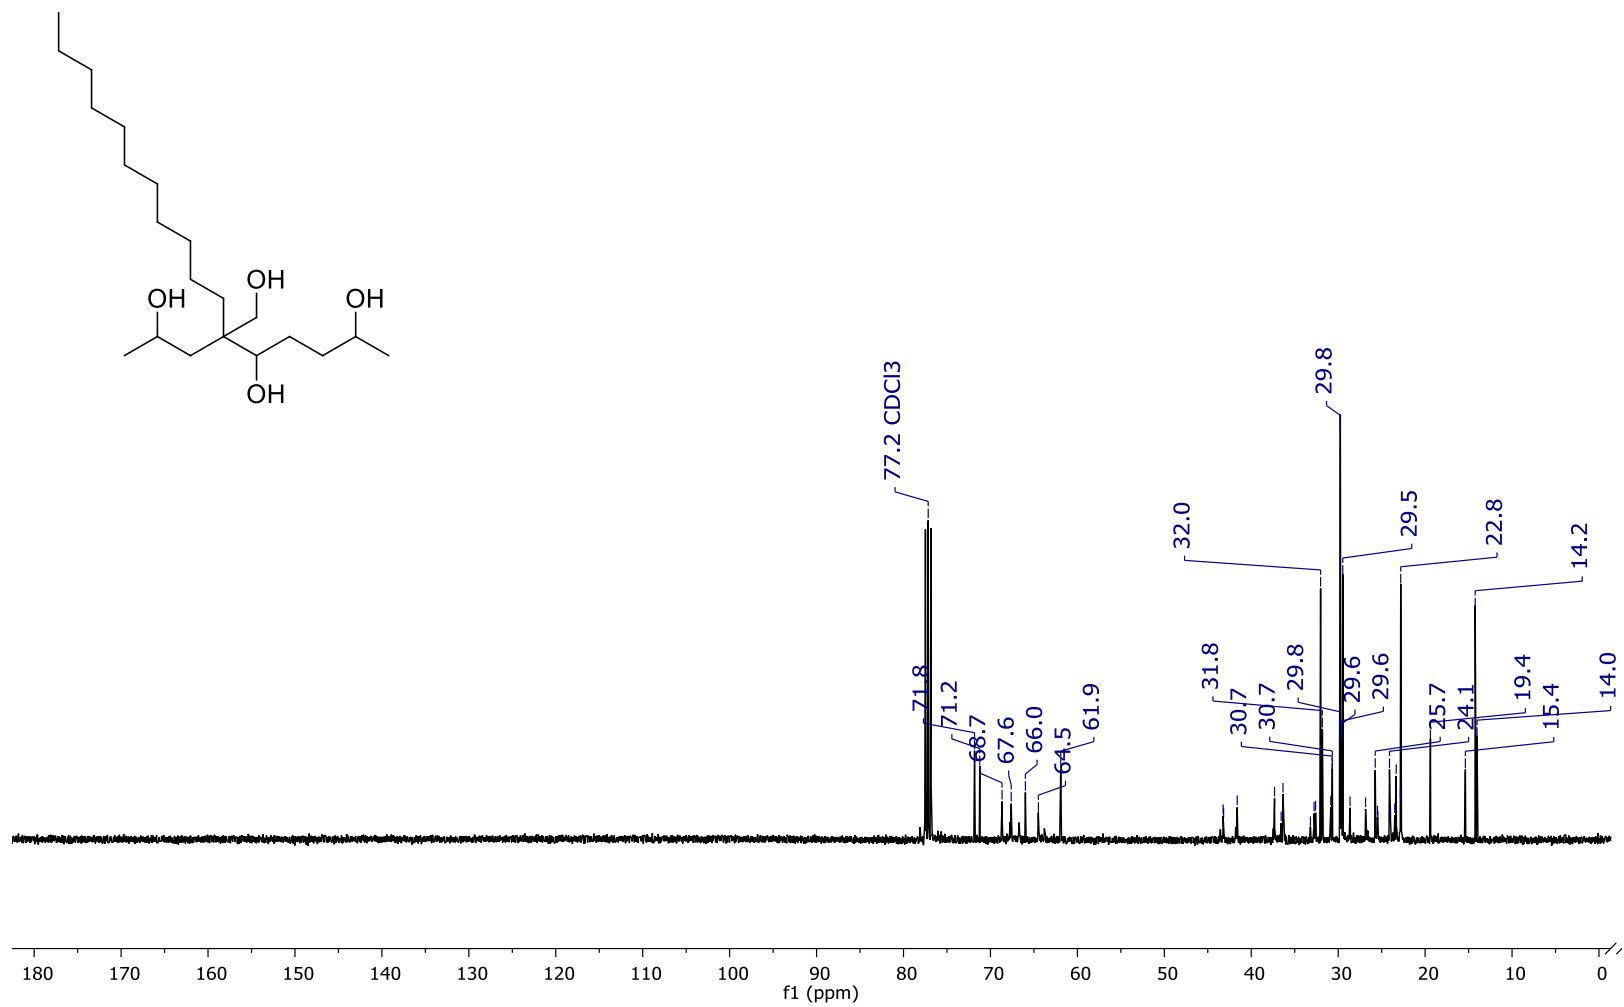

Diastereisomeric mixture

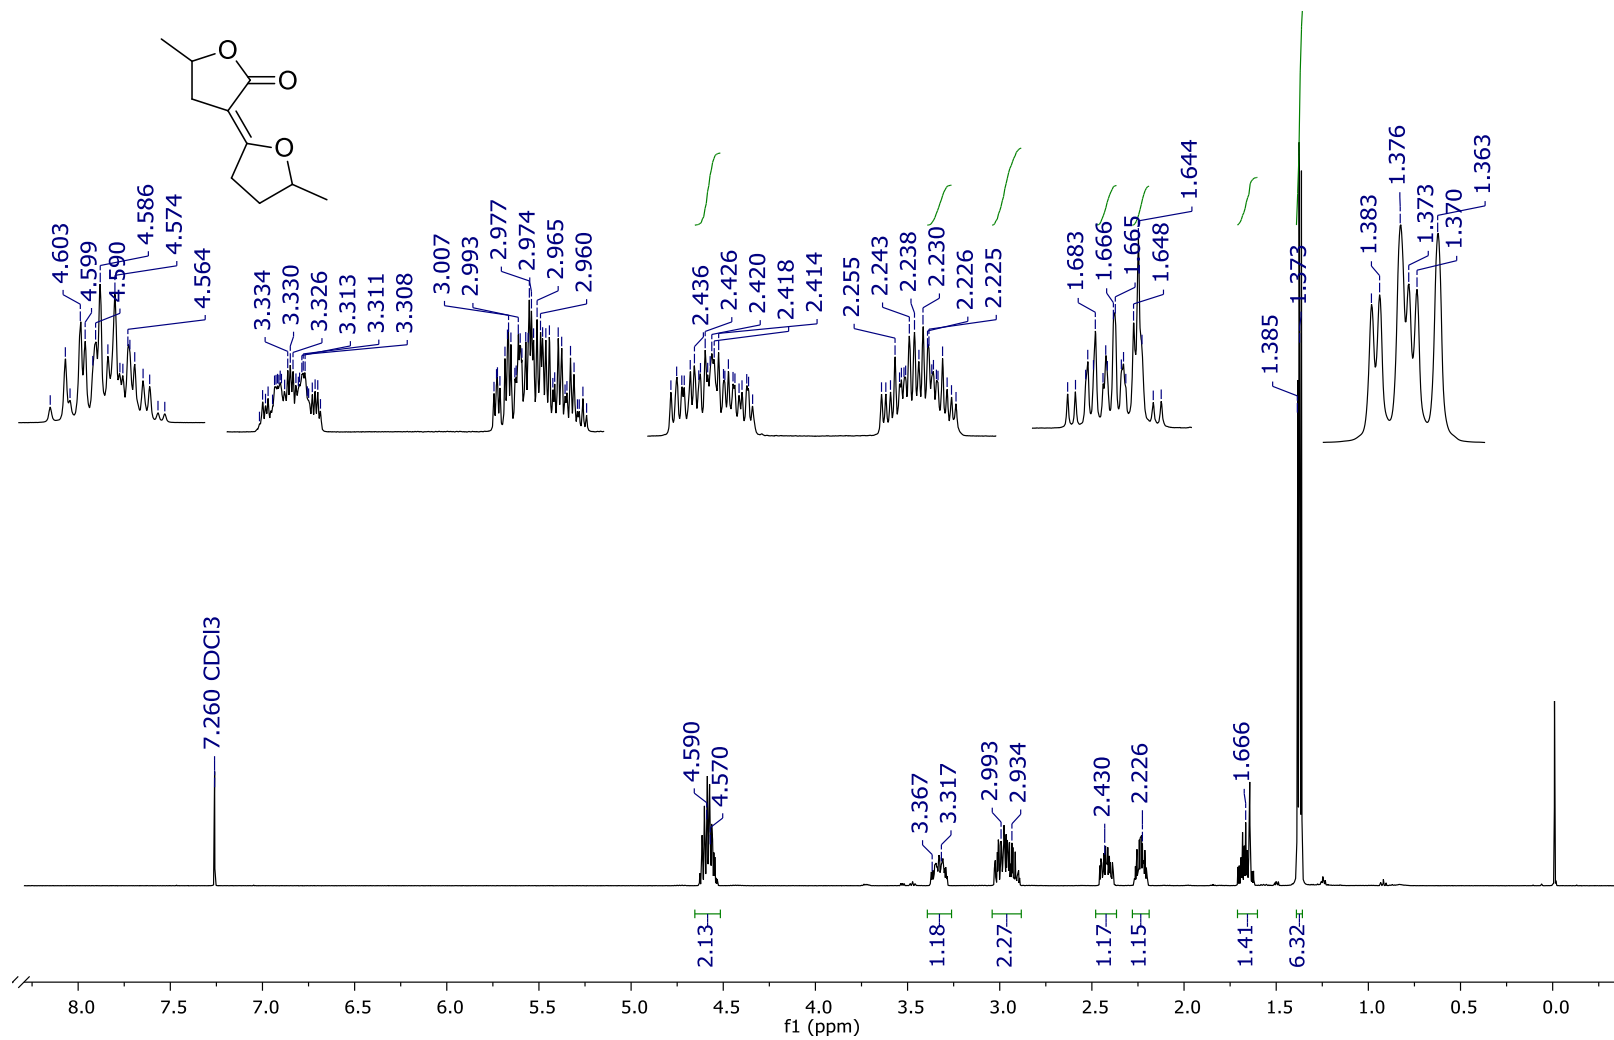

Diastereisomeric mixture

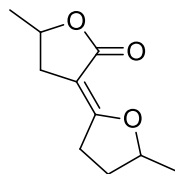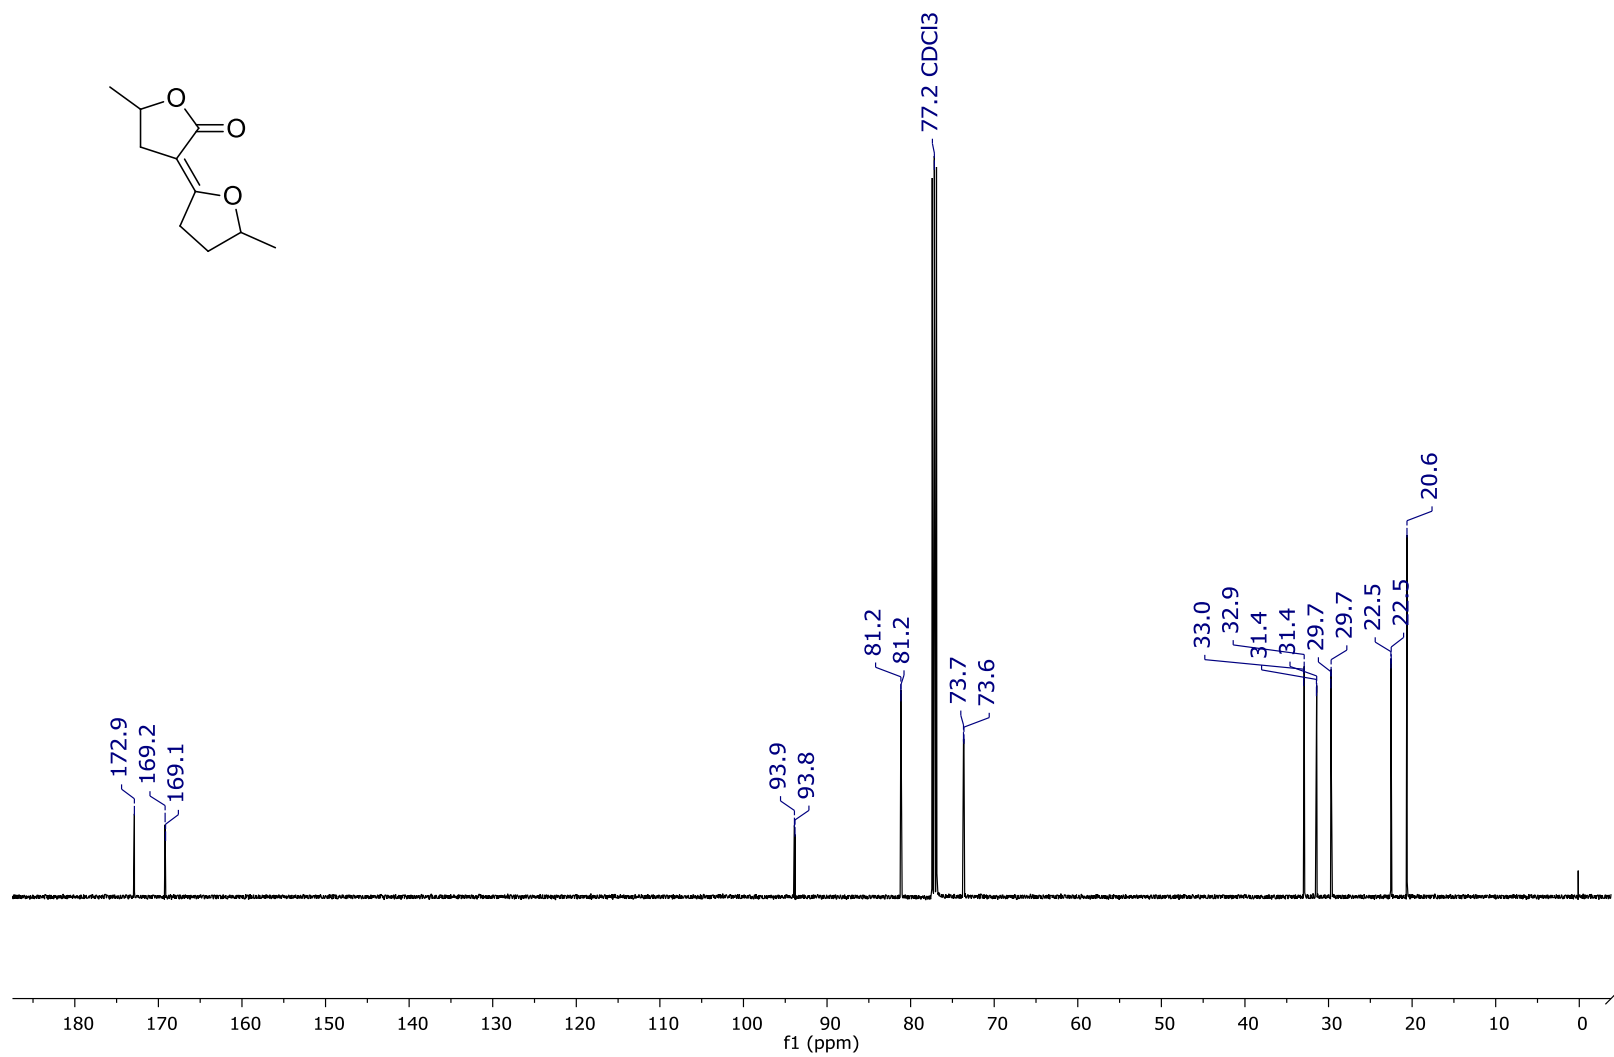

Diastereisomeric mixture

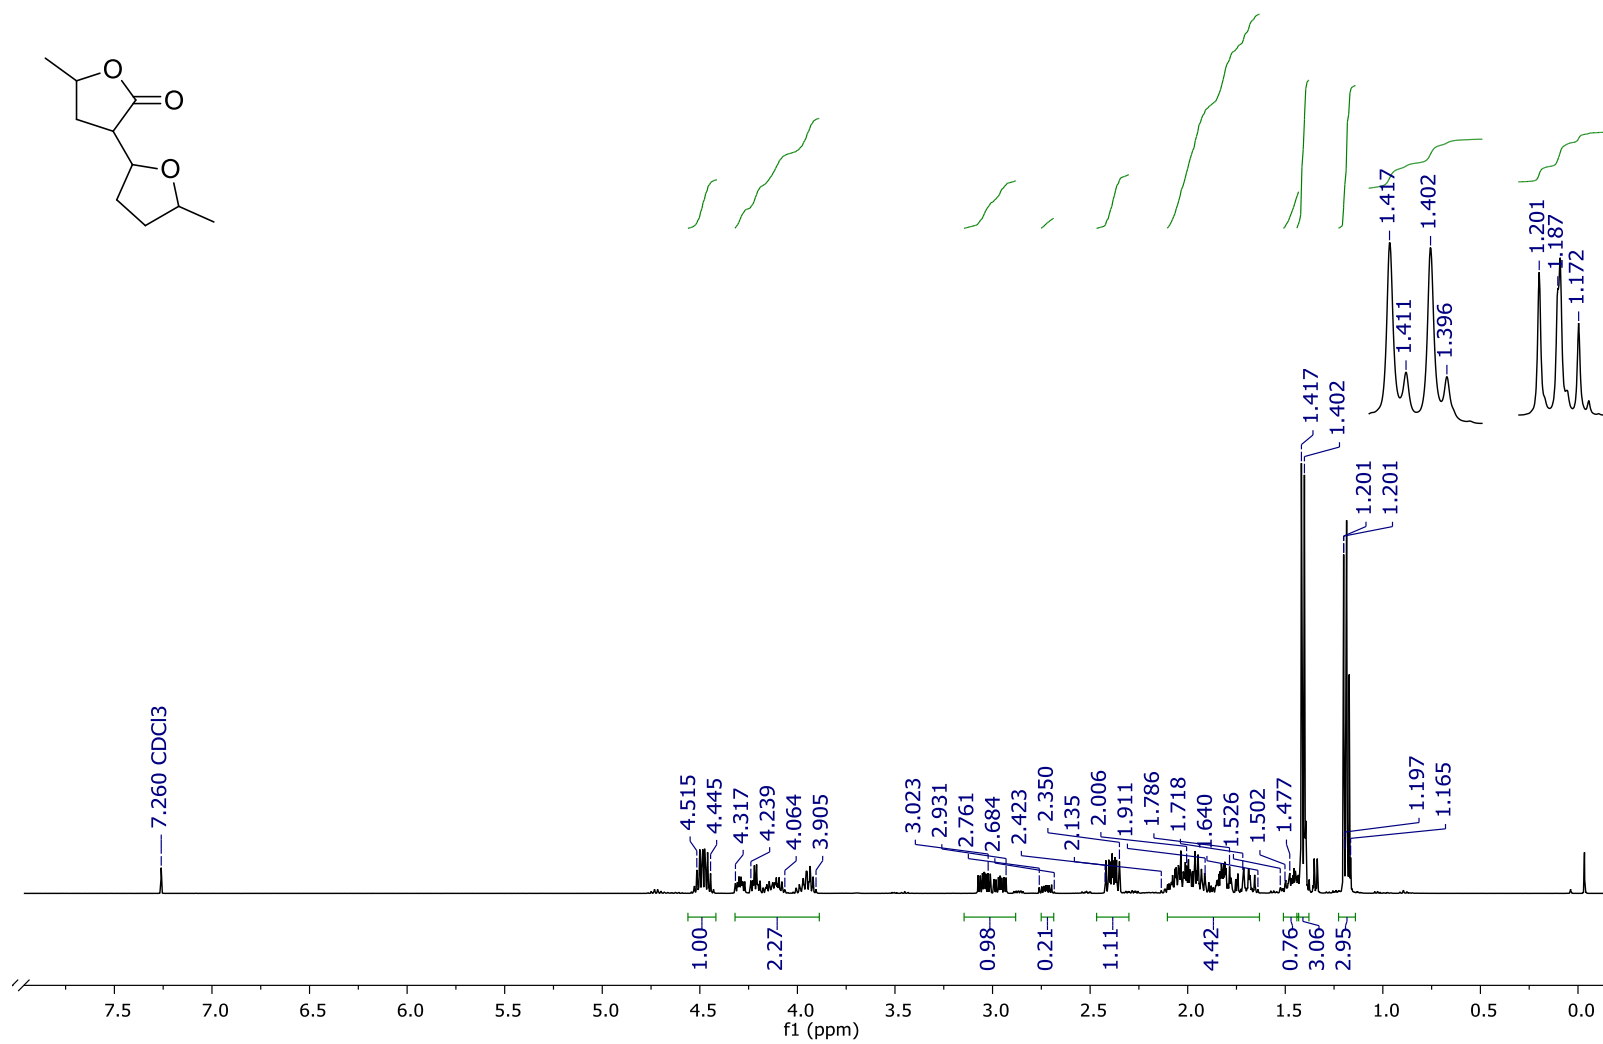



Diastereisomeric mixture

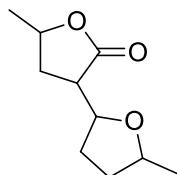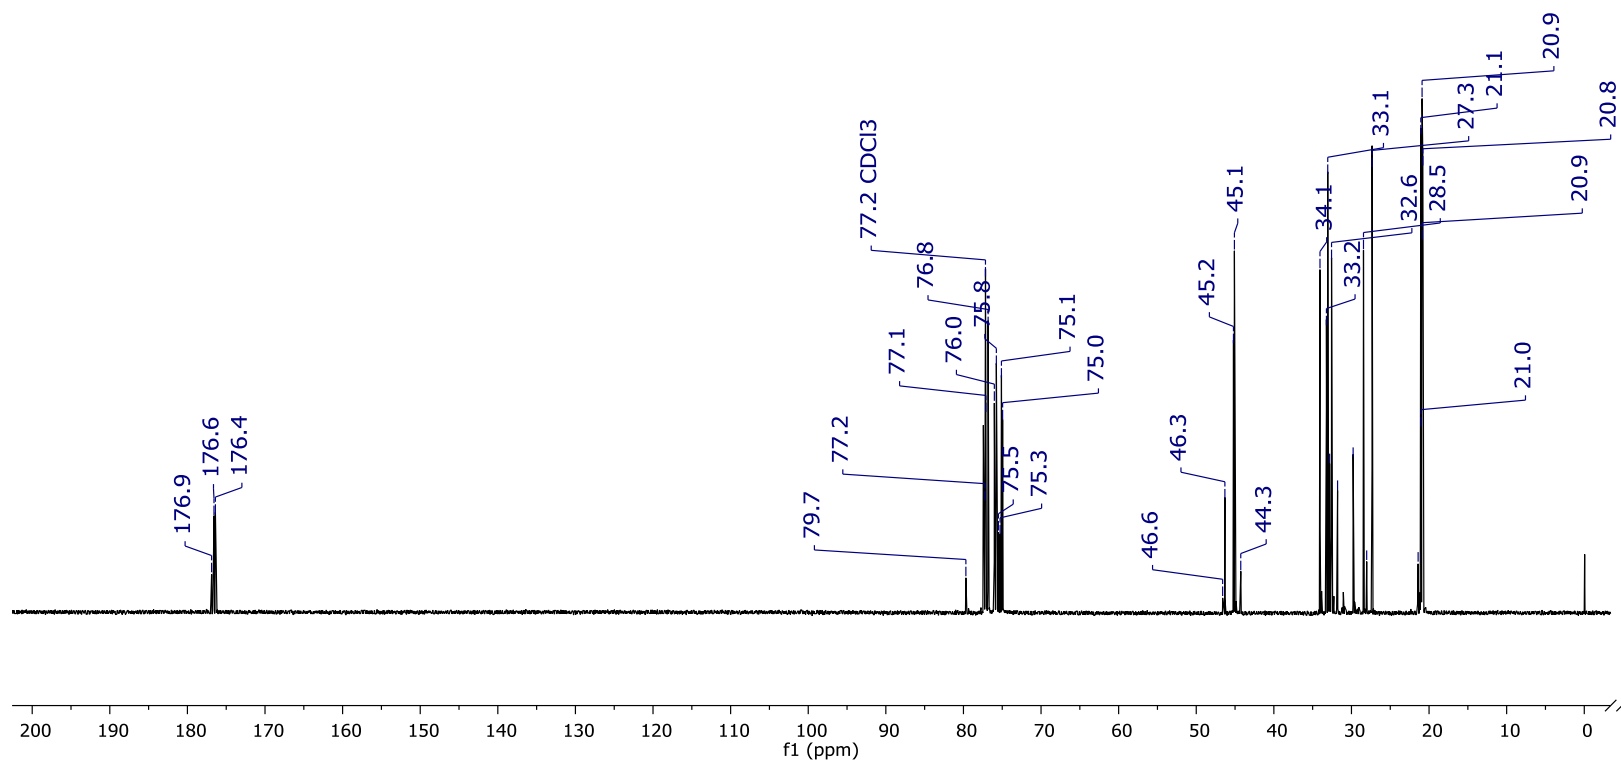

Diastereisomeric mixture

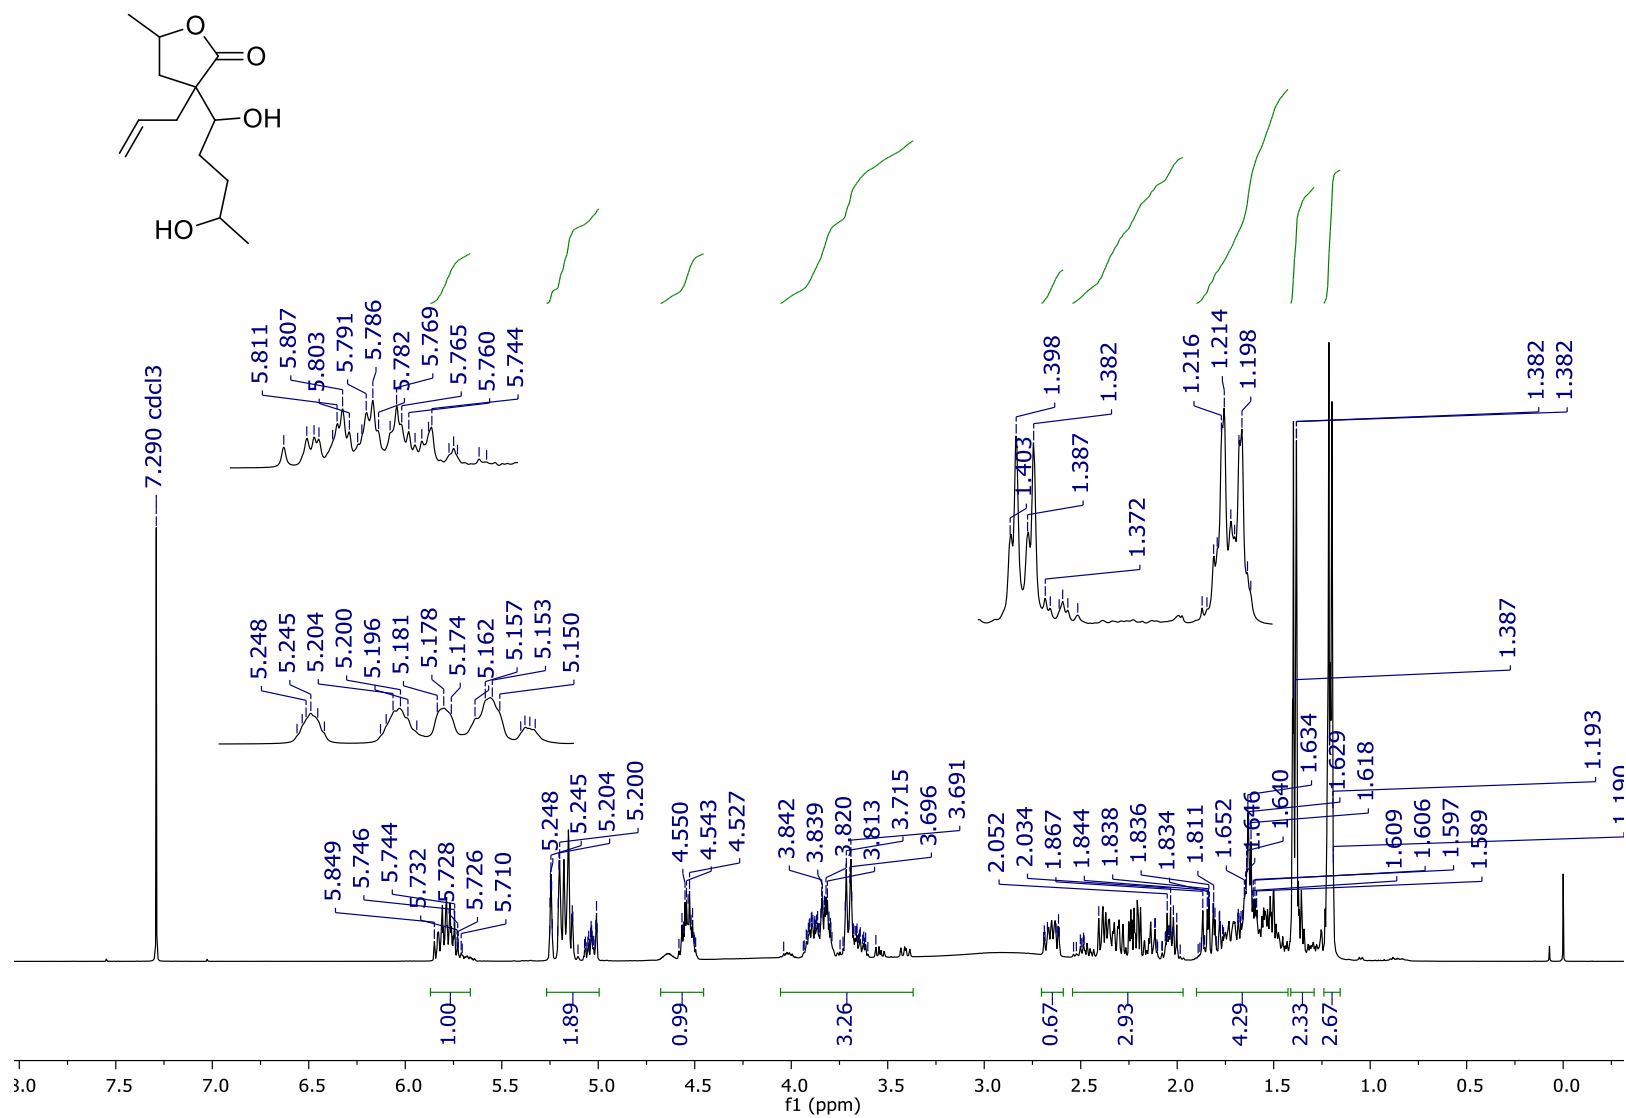

Diastereisomeric mixture

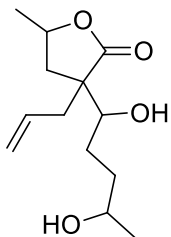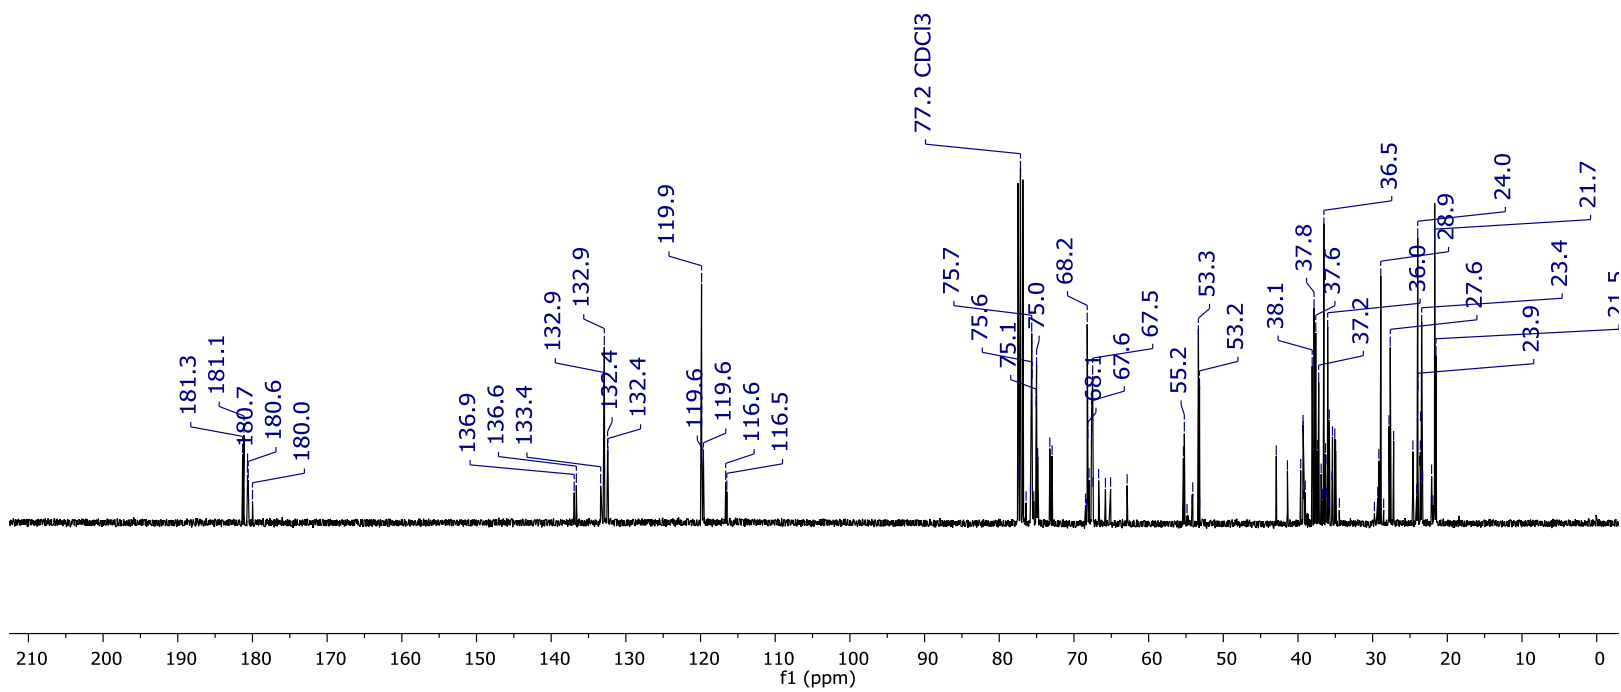

Supplement: c9gc03343b1.pdf [file c9gc03343b1.pdf]
